1 **The Cholesteryl Ester Transfer Protein (CETP) raises Cholesterol Levels in the Brain and**  
2 **affects Presenilin-mediated Gene Regulation.**

3

4 Running title: CETP increases brain cholesterol and  $\gamma$ -secretase activity

5

6 **Felix Oestereich<sup>1,2,3</sup>, Noosha Yousefpour<sup>1</sup>, Ethan Yang<sup>4</sup>, Alfredo Ribeiro-da-Silva<sup>1</sup>, Pierre**  
7 **Chaurand<sup>4</sup>, Lisa Marie Munter<sup>1,2</sup>**

8 <sup>1</sup>Department of Pharmacology and Therapeutics, McGill University, 3649 Promenade Sir William  
9 Osler, Montreal, QC, Canada H3G 0B1

10 <sup>2</sup>Cell Information Systems group, Bellini Life Sciences Complex, 3649 Promenade Sir William Osler,  
11 Montreal, QC, Canada H3G 0B1

12 <sup>3</sup>Integrated Program in Neuroscience, McGill University, Montreal, QC, Canada H3A 2B4

13 <sup>4</sup>Department of Chemistry, Université de Montréal, Montreal, QC, Canada H3C 3J7

14

15 **Correspondence:** Dr. Lisa Munter, [lisa.munter@mcgill.ca](mailto:lisa.munter@mcgill.ca), McGill University, Department of  
16 Pharmacology and Therapeutics, Bellini Life Sciences Complex, 3649 Promenade Sir-William Osler,  
17 Montreal, QC, Canada, H3G 0B1

18

19 **Funding:** This work was funded by the Alzheimer Society of Canada Young Investigator grant PT-  
20 58872 and regular Research Grant 17-02, the Weston Brain Institute award RR172187, and the  
21 Canadian Institute of Health Research CIHR-PJT-162302, and was supported by the Fonds de  
22 recherche du Québec - santé FRQS research allocation FRQ-S 36571, the Canada Foundation of  
23 Innovation Leaders Opportunity Fund Grant 32565, and Natural Sciences and Engineering  
24 Research Council of Canada (NSERC) Discovery Grants RGPIN-2015-04645 to LM and RGPIN-  
25 2015-06802 to PC. ARdS acknowledges support from CIHR project grant PJT-166195. FO received  
26 studentships through the Integrated Program in Neuroscience (IPN) and from the Canada First

- 27 Research Excellence Fund, awarded to McGill University for the Healthy Brains for Healthy Lives  
28 initiative. NY was the recipient of a doctoral studentship from the Louise and Alan Edwards  
29 Foundation. EY received a doctoral studentship from NSERC.

30 **Abstract**

31 The cholesteryl ester transfer protein (CETP) is a lipid transfer protein responsible for the exchange  
32 of cholesteryl esters and triglycerides between lipoproteins. Decreased CETP activity is associated  
33 with longevity, cardiovascular health, and maintenance of good cognitive performance. Interestingly,  
34 mice lack the CETP-encoding gene and have very low levels of low-density lipoprotein (LDL) particles  
35 compared to humans. To understand how CETP activity affects the brain, we utilised CETP transgenic  
36 (CETPtg) mice showing elevated LDL levels on a high cholesterol diet inducing CETP expression.  
37 We found that CETPtg mice had up to 25% higher cholesterol levels in the brain. Using a microarray  
38 on astrocyte-derived mRNA, we found that this cholesterol increase is likely not due to astrocytic-  
39 dependent *de novo* synthesis of cholesterol. Rather, several genes linked to Alzheimer's disease  
40 were altered in CETPtg mice. Most interestingly, we found activation of the G-protein coupled receptor  
41 EP4 and  $\gamma$ -secretase as upstream regulators of these transcriptional changes. Further *in vitro* studies  
42 showed that CETP expression was sufficient to activate  $\gamma$ -secretase activity. The data suggest that  
43 CETP activity affects brain's health through modulating cholesterol levels and Alzheimer's-related  
44 pathways. Therefore, CETPtg mice constitute a valuable research tool to investigate the impact of the  
45 cholesterol metabolism on brain functions.

46

47 **Key words:**

48 Alzheimer's disease, cholesteryl ester transfer protein (CETP), cholesterol, gamma-secretase,  
49 presenilin, mass spectrometry, microarray, brain lipids, complement system, C1Q, prostaglandin  
50 receptor EP4, TREM2.

## 51 **Introduction**

52 Cholesterol is a major constituent of biomembranes and precursor for various hormones. In most  
53 tissues, the cholesterol concentration is about 2 mg/g tissue, however, it reaches 15-20 mg/g in tissue  
54 of the central nervous system (CNS) (1). Thus, the brain contains 25% of the total body cholesterol,  
55 suggesting a special need of the brain for cholesterol (2). In the blood, dietary cholesterol is  
56 transported by very-low density lipoprotein (VLDL) or low-density lipoprotein (LDL) particles that are  
57 secreted by the liver to deliver cholesterol to extrahepatic tissues (3). Reverse cholesterol transport  
58 from the periphery back to the liver occurs via high-density lipoprotein (HDL) particles (4). However,  
59 the brain seems to be excluded from these distribution cycles since neither VLDL or LDL particles  
60 cross the blood-brain barrier (2,5-7). In the CNS, astrocytes are the cell type primarily involved in lipid  
61 synthesis and secrete HDL-like lipoprotein particles that contain predominantly apolipoprotein E  
62 (ApoE) as the apolipoprotein (8). Such particles are taken up by neurons through members of the  
63 LDL-receptor family that recognise ApoE including the LDL-receptor related protein 1 (LRP1) (9).

64  
65 The cholesteryl ester transfer protein (CETP) is a lipid transfer protein that facilitates the exchange of  
66 cholesteryl esters in HDL for triglyceride in VLDL and LDL (10,11). The net result of this transfer  
67 activity is increased cholesterol content in pro-atherogenic LDL particles and decreased cholesterol  
68 levels in anti-atherogenic HDL particles (12). Studies investigating the genetic predisposition of  
69 “super-agers” or “centenarians” with well-maintained health and cognitive performance, revealed that  
70 polymorphisms that impair CETP’s activity associate with longevity, cardiovascular health, and good  
71 cognitive performance (13-15). Based on these findings, several studies investigated whether CETP  
72 polymorphisms could decrease the risk for Alzheimer’s disease, an aging-associated  
73 neurodegenerative disease. Indeed, protective effects of CETP polymorphisms at *early* Alzheimer’s  
74 disease stages were reported, particularly in carriers of the strongest genetic risk factor, the  $\epsilon$ 4 allele  
75 of the apolipoprotein E (ApoE4) (16-19). ApoE is the predominant lipoprotein of the brain, in contrast  
76 to the blood where there are several apolipoprotein-defined lipoprotein families (20). Those



77 epidemiological findings indicate that CETP activity may impact on cognitive performance and brain  
78 functions, however, the underlying molecular mechanisms remain unclear.

79

80 While CETP is predominantly expressed in the liver and secreted to the blood, it is expressed in  
81 astrocytes as well (21). However, its function in the CNS remains elusive. Considering the important  
82 effect of CETP on systemic cholesterol levels, we hypothesised that CETP may also contribute to the  
83 alterations of the brain's cholesterol levels. It is important to note that mice naturally lack CETP and  
84 therefore they have considerably less LDL compared to humans (22). To gain insight on how CETP  
85 may impact on cognitive performance in humans, we used a well-established CETP<sup>tg</sup> mouse model  
86 expressing the human CETP gene under its natural promoter (CETP<sup>tg</sup>) that is frequently used in the  
87 cardiovascular research field (23). The promoter contains a cholesterol responsive element that  
88 induces CETP gene expression in response to dietary lipids. Therefore, CETP expression in CETP<sup>tg</sup>  
89 mice leads to increased LDL levels and could thus be regarded as a mouse model with a humanised  
90 (normolipidemic) lipoprotein profile (24). We herein characterised the effects of CETP expression on  
91 molecular changes in the brain in CETP<sup>tg</sup> mice. We observed higher cholesterol levels in the brains  
92 of CETP<sup>tg</sup> as compared to wild type (wt) mice. Transcriptome profiling of astrocytes indicated  
93 decreased cholesterol synthesis, and modulation of several genes linked to Alzheimer's disease  
94 including an overall activation of presenilin-mediated signaling.

95

## 96 **Methods:**

97 All experiments were conducted in accordance with McGill University environmental health and safety  
98 regulations (EHS) as well as the Canadian biosafety standards and guidelines.

99 **Cell culture:** HEK293T cells were cultivated in 1:1 Dulbecco's modified Eagle medium (DMEM)  
100 supplemented with 0.584 g/l L-glutamine and 0.11 g/l sodium pyruvate (Wisent), and 10% FCS  
101 (Wisent), at 37°C and 5% CO<sub>2</sub>. For transient transfections, 1.5 x 10<sup>5</sup> cells per well (12-well plates)  
102 were seeded 24 h before transfection. Cells were transiently transfected with 1 µg DNA in total and 2

103  $\mu$ l polyethyleneimine (PEI) per well. 36 hours after transfection, cell culture supernatant was collected,  
104 and cells were lysed with TNE-lysis buffer (50 mM Tris, pH 7.4, 150 mM NaCl, 2 mM EDTA, 1% NP40,  
105 and complete protease inhibitors, Roche) and prepared for SDS-polyacrylamide gel electrophoresis  
106 (SDS-PAGE).

107 **Western blot analysis of mouse tissue samples:** Fresh frozen liver or brain samples  
108 (approximately 100 mg) were lysed in 5x volume of lysis buffer (150 mM NaCl, 10% Glycerol, 2 mM  
109 EDTA, 0.5% NP-40, 0.1% sodium-deoxycholate, 20 mM HEPES, 1x complete protease-inhibitor  
110 cocktail (Roche), pH 7.4) using lysing-matrix D at 6000 rpm for 40 seconds. The lysates were further  
111 diluted 1:5 in lysis buffer. For western-blot analysis, liver samples were prepared for SDS-  
112 polyacrylamide gel electrophoresis (SDS-PAGE) and loaded on either 10% or 15% SDS-  
113 polyacrylamide gels. The following primary antibodies were used: 22C11 (Millipore), rabbit-anti-  
114 GAPDH (14C10, Cell Signaling), TP2 (kind gift of the Ottawa Heart Institute), anti-TREM2 (Mab1729  
115 R&D systems) and anti-ABCA7 (polyclonal, Thermo Fisher). Horseradish peroxidase (HRP)-coupled  
116 secondary antibodies directed against mouse or rabbit IgG were purchased from Promega.  
117 Chemiluminescence images were acquired using the ImageQuant LAS 500 system (GE Healthcare).

118 **Quantitative real time PCR (RT-qPCR):** mRNA was isolated from mouse tissue using the Macherey  
119 & Nagel mRNA-isolation kit in combination with lysing matrix D. Briefly, 25-50  $\mu$ g of fresh frozen tissue  
120 were lysed in 450  $\mu$ L RNA preparation buffer (with  $\beta$ -mercaptoethanol) in lysing matrix D tubes using  
121 a magna lyser (6000 rpm 2x 30 seconds) according to manufacturer's instructions. The RNA  
122 concentration was adjusted to 100 pg/mL and 500 ng of RNA were transcribed into cDNA using the  
123 high-capacity cDNA reverse-transcription kit (Applied Biosystems) according to manufacturer's  
124 instructions. RT-qPCR was performed using the SsoAdvanced SYBR green supermix (Biorad)  
125 according to manufacturer's instructions on a Biorad CFX384Touch cycler. All primers were ordered  
126 from integrated DNA technologies. Primers used were: CETP forward:  
127 CAGATCAGCCACTTGTCCAT, CETP reverse: CAGCTGTGTGTTGATCTGGA, ABCA7 forward:  
128 TTCTCAGTCCCTCGTCACCCAT, ABCA7 reverse: GCTCTTGTCTGAGGTTCCCTCGT, TNF $\alpha$

129 forward: GGTGCCTATGTCTCAGCCTCTT, TNF $\alpha$  reverse: GCCATAGAAGCTGATGAGAGGGAG,  
130 IL1 $\beta$  forward: TGGACCTTCCAGGATGAGGACA IL1 $\beta$  reverse: GTTCATCTCGGAGCCTGTAGT,  
131 TLR4 forward: AGCTTCTCCAATTTTTCAGAACTTC, TLR4 reverse:  
132 TGAGAGGTGGTGTAAGCCATGC, TREM2 forward: ACAGCACCTCCAGGAATCAAG, TREM2  
133 reverse: AACTTGCTCAGGAGAACGCA, IL6 forward: CCTCTGGTCTTCTGGAGTACC, IL6 reverse:  
134 ACTCCTTCTGTGACTCCAGC, HES1 forward: p21 forward: GCCTTAGCCCTCACTCTGTG p21  
135 reverse: AGCTGGCCTTAGAGGTGACA, HES1 forward: CGGAATCCCCTGTCTACCTC, HES1  
136 reverse: AATGCCGGGAGCTATCTTTCT. The following primers were used as reference genes:  
137 HPRT forward: CCAGTTTCACTAATGACACAAACG, HPRT reverse:  
138 CTGGTGAAAAGGACCTCTCGAAG, PSMC4 forward: CCGCTTACACACTTCGAGCTGT, PSMC4  
139 reverse: GTGATGTGCCACAGCCTTTGCT, GAPDH forward: CATCACTGCCACCCAGAAGACTG,  
140 GAPDH reverse: ATGCCAGTGAGCTTCCCGTTCAG, Actin- $\beta$  forward:  
141 CATTGCTGACAGGATGCAGAAGG, Actin- $\beta$  reverse: TGCTGGAAGGTGGACAGTGAGG. Primer  
142 efficiency for all primers was determined to be between 90-110%. For normalization of gene  
143 expression, the four genes ACT, GAPDH, HPRT and PSMC4 were used as reference genes. RT-  
144 qPCR was analysed using the CFX manager software (Biorad).

145 **Imaging mass spectrometry (IMS):** Sample preparation: The fresh frozen brain samples were  
146 sectioned sagittally at 14  $\mu$ m thickness and the frozen brain homogenates at 20  $\mu$ m thickness with a  
147 Leica CM3050 cryostat at -20°C (Leica Microsystems GmbH, Wetzlar, Germany). All brain  
148 specimens were cut at approximately the same Bregma in order to clearly delineate the hippocampus.  
149 Brain homogenates were prepared according to published protocols (25) and were used to normalise  
150 data across experiments. For each technical replicate, one tissue section of each condition was thaw-  
151 mounted in a 2 x 2 pattern on a 25 x 75 mm indium-tin-oxide (ITO) coated microscope slide (Delta  
152 Technologies, Loveland, CO), along with two sections of frozen brain homogenate on the left and  
153 right of the grid. After desiccation in a vacuum pump desiccator for  $\leq$  1 hour, a  $23 \pm 2$  nm silver layer  
154 was deposited onto the sections using a Cressington 308R sputter coater (Ted Pella Inc, Redding,

155 CA) as per the protocol detailed in Dufresne et al 2013 (26). The argon partial pressure was set at  
156 0.02 mbar and the current at 80 mA. Data acquisition: IMS data were acquired at 50  $\mu\text{m}$  spatial  
157 resolution and 100 shots per raster position with a “small” laser setting using a “matrix-assisted laser  
158 desorption/ionization-time of flight (MALDI-TOF/TOF) ultrafleXtreme mass spectrometer (Bruker  
159 Daltonics, Billerica, MA) equipped with a SmartBeam-II Nd:YAG/355-nm laser operating at a repetition  
160 rate of 1 kHz using flexImaging 4.1 software (Bruker Daltonics, Billerica, MA). All instrumental  
161 parameters (source voltages, laser energy, delayed extraction parameters, etc.) were optimised for  
162 maximum signal-to-noise ratio within the 100-1100  $m/z$  range in the reflectron geometry, with the  
163 acceleration voltage set to 25 kV. Two 400-pixel squares were also acquired from each brain tissue  
164 homogenate section at the same spatial resolution. Data Analysis: Raw IMS data were first internally  
165 calibrated with the silver isotopic peaks using the flexAnalysis Batch Process software (Bruker  
166 Daltonics, Billerica, CA) to obtain a  $\sim 5$  ppm mass accuracy. Next, IMS data from the hippocampal  
167 and whole brain regions of interests (ROIs) were exported into the common imzML format using  
168 flexImaging 4.1 (27). Using an in-house code based on the Cardinal package (x1.6.0) in R (x3.2.5),  
169 the mean area and standard deviation of the two cholesterol signals ( $m/z$  493.26 and  $m/z$  495.26,  
170 corresponding to the  $[\text{M}+^{107}\text{Ag}]^+$  and  $[\text{M}+^{109}\text{Ag}]^+$  molecular ions, respectively) were calculated for the  
171 ROIs after independent TIC normalization (28). The same code was used to obtain the mean of the  
172 summed areas of the ten most abundant signals in the homogenate squares. This value acted as the  
173 correction factor to correct for variations in signal intensity across all experiments. The final cholesterol  
174 intensity reported is the mean across the three technical triplicates for one group normalised against  
175 the correction factor. Unless otherwise noted, all solvent and material were purchased from Thermo  
176 Fisher Scientific (Ottawa, ON). The silver target 3N5 (99.95% purity) used for tissue sputter-coating  
177 was purchased from ESPI Metals (Ashland, OR).

178 **Filipin staining and Immunohistochemistry:** Fresh-frozen brains were cut on the sagittal plane at 25  
179  $\mu\text{m}$  thickness using a cryostat (Leica, Germany). Sections were then collected and fixed in 4%  
180 paraformaldehyde at 4°C for two hours. Filipin III (stock powder) was dissolved at a concentration of 10

181 mg/ml in dimethylformamide (DMF) and diluted 100-fold with 10 mM phosphate buffered saline (PBS).  
182 For Filipin staining, tissues were washed in PBS and incubated in 0.01 mg/ml Filipin complex solution  
183 (Sigma Aldrich) at room temperature for two hours. After washing with PBS, brain sections were mounted  
184 on a microscope slide and imaged with Zeiss AxioImager M2 Imaging microscope with the Zeiss ZenPro  
185 software v.2.3 (Zeiss Canada). For Immunohistochemistry, brain sections were permeabilized with 0.2%  
186 Triton-X in PBS (PBST) and blocked for 1 hour at room temperature in 10% normal donkey or goat serum.  
187 Sections were incubated in a cocktail of primary antibodies composed of mouse anti-GFAP (Cell signaling,  
188 cat # 3670, 1:1000), and rabbit anti-C1q (Abcam, cat # ab182451, 1:400) prepared in 5% blocking solution  
189 for 12 h at 4°C. Primary antibody labelling was detected using species-specific secondary antibodies  
190 conjugated to Alexa 488, and Alexa 568 (Invitrogen, 1:800, incubated at room temperature for 2 hours).  
191 Sections were mounted on gelatin subbed slides and coverslipped using Prolong Gold Antifade mounting  
192 medium (Invitrogen) and Zeiss cover slips. Sections were imaged using Zeiss LSM 800 confocal  
193 microscope. For image analysis, Filipin and C1q fluorescence intensity levels were quantified by the  
194 average intensity of staining in ImageJ (NIH) using images captured by 20x objective (C1q) and 40x  
195 objective (filipin). Specifically for filipin staining, all images were thresholded to an equal value that was  
196 determined empirically and only fluorescent intensities corresponding to the cell membranes were  
197 quantified. All values were normalized to the background fluorescence of the corresponding image.

198 **Mouse housing:** The CETP<sup>tg</sup> mouse strain B6.CBA-Tg(CETP)<sup>5203Tall/J</sup> (Jackson strain no.:  
199 003904) (23) were housed according to the McGill University standard operating procedure mouse  
200 breeding colony management #608. All procedures were approved by McGill's Animal Care  
201 Committee and were performed in accordance with the ARRIVE guidelines (Animal Research:  
202 Reporting in Vivo Experiments). Mice were bred heterozygous and non-transgenic littermates were  
203 used as controls. Mice of both sexes were used in analyses at about equal ratios. All mouse diets  
204 were purchased from Envigo. The diets used in this study were: low fat control diet (TD.08485), low  
205 fat diet enriched with 1% cholesterol (TD.140215) and a diet containing 21% fatty acids (FA) and 1%  
206 cholesterol (TD.95286). The FA composition was 65% saturated FA (SFA), 31% monounsaturated

207 FA (MUFA), and 4% polyunsaturated FA (PUFA). Animals of both sexes were assigned randomly to  
208 treatment groups.

209 **Mouse genotyping:** Genotyping was performed by Transnetyx genotyping using real-time PCR from  
210 ear punch tissue. Ear punches were lysed in at 56 °C overnight. Primers used for the transgene were:  
211 forward: GAATGTCTCAGAGGACCTCCC, reverse: CTTGAACTCGTCTCCCATCAG. Primers for  
212 internal controls were: Forward: CTAGGCCACAGAATTGAAAGATCT, reverse:  
213 GTAGTGGAAATTCTAGCATCATCC.

214 **Plasma lipid analysis:** The lipid analysis of mouse plasma samples was performed using the COBAS  
215 Integra 400 Plus (ROCHE) and the following kits: COBAS INTEGRA CHOL 2, COBAS INTEGRA  
216 HDL-C gen3, and COBAS Integra TRIG GPO 250, respectively. The levels of LDL-C were calculated  
217 using the Friedewald formula: [total cholesterol] – [HDL-C] – [TG/2.2].

218 **CETP activity assay:** CETP activity was measured using the Roar biomedical Inc. fluorescent CETP  
219 activity assay. Here, 5 µL of cell culture supernatant was incubated with 0.3 µL donor and 0.3 µL  
220 acceptor molecules in 30 µL reaction volume. The reaction mix was incubated for 3 hours at 37 °C in  
221 a water bath and the fluorescence ( $\lambda_{ex}$  465/ $\lambda_{em}$  535) was measured.

222 **Astrocyte purification:** Astrocytes were purified using the Anti-GLAST (ACSA-1) MicroBead Kit  
223 (Miltenyi biotec). Briefly, whole mouse brains were dissociated using a miltenyi gentleMACS Octo  
224 dissociator with Heaters, and GLAST positive astrocytes were isolated using anti-GLAST (ACSA-1)  
225 antibody magnetic beads according to manufacturer's instructions.

226 **Flow cytometry:** Purified astrocytes were EtOH fixed and stained with a Cy3 labelled anti-GFAP  
227 antibody (1:1000, Sigma). The samples were run on a BD LSRFortessa flow cytometer and the GFAP-  
228 Cy3 emission was detected using a 561 nm laser for excitation. The detector channel used was  
229 586/15 nm. BD FACSDIVA 8.0.1. was used for analysis.

230 **Astrocyte microarray:** RNA from GLAST-positive astrocytes was isolated using the Macherey &  
231 Nagel mRNA isolation kit. The Affymetrix clariom-S nano microarray was performed at the  
232 Genomecenter Quebec according to manufacturer's instructions. The initial microarray dataset was

233 analysed using Transcriptome Analysis Software (Affymetrix). Upstream regulator and pathway  
234 analyses were performed using Ingenuity Pathway Analysis (IPA). GEO accession number:  
235 GSE111242.

236 **Statistical analysis:** Statistical analysis was performed using the Graphpad Prism 7 and 8 software.  
237 Analyses include only parametric tests: students T-test, and two-way ANOVA followed by Bonferroni  
238 corrections and Tukey's multiple comparison tests. All p values, statistical tests, N values and the  
239 experimental unites employed are indicated in figure legends.

240

241

242 **Results:**

243 **Dietary cholesterol intake induces CETP expression**

244 CETP<sup>tg</sup> animals have been widely used in cardiovascular research (23). However, it remained  
245 unclear if fatty acids further induce CETP expression in addition to dietary cholesterol. To identify the  
246 ideal diet for inducing CETP expression in the CETP<sup>tg</sup> model, we compared a diet enriched with 1%  
247 (w/w) cholesterol to a diet containing 1% cholesterol plus 21% (w/w) fatty acids (cholesterol/FA) for  
248 their effects on CETP expression in CETP<sup>tg</sup> mice. Wt and CETP<sup>tg</sup> mice received diets for one month  
249 starting at 2 months of age (**Figure 1A**). As expected, CETP<sup>tg</sup>, but not wt mice showed CETP activity,  
250 confirming that there is no compensatory mechanism for the lack of CETP in wt mice. CETP activity  
251 was increased 2-fold in animals that were on a diet enriched in cholesterol or cholesterol/FA as  
252 compared to mice on standard diet (**Figure 1B**). Likewise, both high fat diets induced a 2-fold increase  
253 of circulating CETP protein levels in mouse plasma, as determined by western blot (**Figure 1D, E**).  
254 Further, we quantified CETP mRNA levels in liver by RT-qPCR and found that the diet supplemented  
255 only with cholesterol induced a bigger increase of CETP mRNA levels (8.8-fold) as compared to the  
256 high cholesterol/FA diet (7-fold) (**Figure 1C**). When assessing the lipid profile in plasma, we found  
257 that CETP<sup>tg</sup> mice had lower HDL levels on standard and high cholesterol diets, an effect that was  
258 missing in mice receiving the cholesterol/FA diet (**Figure 1F**). LDL cholesterol levels were significantly  
259 elevated in CETP<sup>tg</sup> animals fed with a cholesterol-enriched diet, which was not observed in animals  
260 fed with a cholesterol/FA diet, although both diets led to a similar increase in CETP activity and protein  
261 levels (**Figure 1G**). It is important to note that those LDL levels of approximately 1.2 mmol/L observed  
262 in CETP<sup>tg</sup> mice are still relatively low considering that human LDL levels < 3 mmol/L are still being  
263 considered healthy levels. Total cholesterol was not significantly affected by the diets (**Figure 1H**).  
264 However, we found a trend towards decreased levels of triglycerides in animals fed with the  
265 cholesterol diet independent of the genotype (**Figure 1I**). Finally, we analysed the net weight gain of  
266 mice during the 4-week diet period. In contrast to the cholesterol/FA diet, mice on the cholesterol diet  
267 did not show an additional weight gain as compared to standard diet (**Figure 1J**). Together, high



268 CETP expression and enhanced activity are achieved with both diets. However, the blood lipoprotein  
269 profile only changed towards a more human-like profile, i.e. increased LDL levels, in mice receiving  
270 the cholesterol-only diet. In addition, since cholesterol-enriched food did not impact the weight of  
271 mice, this diet has the advantage that potentially confounding factors such as obesity can be  
272 excluded. Thus, we chose to use the 1% cholesterol diet for further experiments.

273

#### 274 **CETP promotes TREM2 expression in the liver**

275 To ultimately study the chronic effect of CETP expression on the brain, we expanded the diet period  
276 to 3 months (**Figure 2A**). First, we analyzed the effect of CETP on plasma LDL levels and  
277 transcriptional changes in the liver. Dietary cholesterol is known to decrease cholesterol synthesis  
278 and transcription of genes involved in cholesterol synthesis (the rate-limiting enzyme 3-hydroxy-3-  
279 methylglutaryl-coenzyme A reductase, HMGCR) and cholesterol uptake (LDL-receptor, LDLR, and  
280 the lipoprotein-receptor-related protein-1, LRP1) through regulation of the sterol regulatory element-  
281 binding protein-2 (SREBP-2) (29). Indeed, HMGCR, LDLR, and LRP1 mRNA levels were decreased  
282 on high cholesterol diet in wt and CETP<sup>tg</sup> mice as compared to wt mice on a standard diet at the age  
283 of 5 months (**Figure 2 B-D**) (30). In addition, CETP<sup>tg</sup> mice on a standard diet showed lower HMGCR  
284 and LDLR gene expression levels as compared to wt as well, indicating that the little CETP expressed  
285 on a standard diet already redistributed cholesterol (**Figure 2 B, C**). Additionally, we assessed two  
286 Alzheimer's risk genes, the ATP-binding cassette transporter A7 (ABCA7), a lipid transporter that is  
287 also regulated by SREBP-2, and triggering receptor expressed in myeloid cells 2 (TREM2), a  
288 lipoprotein receptor (31-34). Protein levels of ABCA7 were increased 2-fold between wt and CETP<sup>tg</sup>  
289 on either diet and the cholesterol diet doubled expression levels (thus a 4-fold difference between the  
290 extremes, wt on standard diet compared to CETP<sup>tg</sup> on cholesterol diet) (**Figure 2E-G**). TREM2 gene  
291 transcription was also increased by both the cholesterol diet and CETP expression leading to an 8-  
292 fold increase of transcript levels comparing the two extremes (wt mice on standard diet with CETP<sup>tg</sup>  
293 mice on cholesterol diet) (**Figure 2H**). However, this transcript increase could not be replicated at the

294 protein level, which could be attributed to overall low signal intensities in the western blot (**Figure 2E**,  
295 I).

296

### 297 **CETP activity promotes peripheral inflammation**

298 It has been previously shown that cholesterol-enriched diets induce inflammation (35). Here we  
299 assessed the effect of CETP as well as high cholesterol diet on peripheral inflammation. Specifically,  
300 we quantified the inflammatory cytokines IL1 $\beta$  and TNF $\alpha$  in mouse plasma samples using multiplex  
301 ELISA of 5 months old mice after 3 months of a 1% cholesterol or control diet. TNF $\alpha$  levels were  
302 significantly increased in CETP<sup>tg</sup> mice as compared to wt mice on cholesterol diet, however, it should  
303 be noted that out of the 10 plasma samples analysed, 6 samples had very low TNF $\alpha$  levels  
304 comparable to the control diets, and only 4 mice showed elevated TNF $\alpha$  levels (**Figure 3A**). Levels  
305 of IL1 $\beta$  were slightly increased in several CETP<sup>tg</sup> mice on the cholesterol diet, and one mouse had  
306 much higher levels (**Figure 3B**). Since CETP is mainly secreted by the liver, we determined mRNA  
307 expression of such cytokines in the liver by qRT-PCR. As expected, the same mice with elevated  
308 plasma cytokine levels also had elevated TNF $\alpha$  and IL1 $\beta$  mRNA levels in liver (**Figure 3C, D**).  
309 Furthermore, mRNA expression of the toll-like receptor 4 (TLR4) as upstream regulator of TNF $\alpha$  and  
310 IL1 $\beta$  was also increased in mice with highest cytokine levels (**Figure 3E**). Similarly, transcript levels  
311 of IL6, an interleukin that was reported to induce the expression of lipid regulating proteins were high  
312 in 3 out of 12 mice (**Figure 3F**) (36). To analyse whether inflammatory cytokine production was  
313 extended to the central nervous system, transcript levels were determined from cortical samples.  
314 While we were able to demonstrate that CETP is expressed in the cortex of CETP<sup>tg</sup> mice, its  
315 expression levels were not affected by dietary cholesterol intake (**Figure 3G**). Importantly, cytokine  
316 levels were not significantly increased in the brain at this age except for IL1 $\beta$  levels (**Figure 3H-J**). In  
317 summary, CETP expression and a cholesterol diet induced inflammatory responses in the periphery,  
318 as expected, with attenuated effects in the brain.

319

## 320 **CETP changes the brain cholesterol composition**

321 To determine the effect of CETP expression and high cholesterol diet on the composition and  
322 distribution of lipids in the brain, we employed matrix-assisted laser desorption/ionization imaging  
323 mass spectrometry (MALDI IMS). While several studies have looked at the distribution of lipids in the  
324 brain by IMS using 1,5-Diaminonaphthalene or other organic matrices (37,38), the visualization of  
325 cholesterol using IMS remained challenging. Here, we deposit a fine homogeneous silver layer over  
326 the tissue sections to promote the laser desorption/ionization (LDI) and allow the imaging of  
327 cholesterol and olefin containing fatty acids with high specificity and sensitivity (26). The heatmap  
328 images depict the distribution of cholesterol in sagittal mouse brain sections detected at  $m/z$  493  
329 ( $[M+^{107}Ag]^+$  silver adduct molecular ion) (**Figure 4A**). Cholesterol is found at the highest  
330 concentrations in the myelin-rich fibre tracts, whereas lower levels are observed in cortex,  
331 hippocampus and cerebellum (**Figure 4A**). Most interestingly, CETPtg mice showed overall higher  
332 cholesterol levels in the brain than wt mice with a  $23\pm 4\%$  increase between wt and CETPtg mice on  
333 standard diet and a  $31\pm 4\%$  increase between wt and CETPtg mice on cholesterol diet over the area  
334 of the whole brain (**Figure 4C, D**). The hippocampal region showed similar trends, albeit without  
335 statistically significant changes (**Figure 4E**). Since peripheral cytokine levels as well as brain IL1 $\beta$   
336 mRNA levels were elevated, we further analysed levels of the fatty acid arachidonic acid as a  
337 precursor of eicosanoids and prostaglandins. Signals for arachidonic acid were comparable between  
338 genotypes and diets (while there may be a trend towards higher levels in CETPtg mice on cholesterol  
339 diet) suggesting overall low abundance of neuroinflammation in CETPtg mice at this age (**Figure 4B,**  
340 **F**).

341 Based on the MALDI-IMS results, the hippocampus shows elevated cholesterol levels in CETPtg  
342 mice. The hippocampus is a well-studied brain region responsible for various critical brain functions  
343 such as memory consolidation and its alterations are commonly associated with cognitive decline. To  
344 confirm the mass spectrometry results with a second independent approach and with higher  
345 resolution, we used filipin staining to assess cholesterol levels in the CA1, CA3, and dentate gyrus

346 (DG) regions of hippocampus (**Figure 4G**). Filipin staining in the hippocampus clearly labeled the  
347 plasma membranes in all conditions. The overall cholesterol levels assessed by intensity of filipin  
348 fluorescence was elevated by 15-25% in all hippocampal regions CETPtg mice as compared to wt  
349 mice on a high cholesterol diet (**Figure 4I-J**). Interestingly, the presence of CETP in CA3 and DG  
350 significantly increased cholesterol levels in the cholesterol-diet group as compared to CETPtg on a  
351 standard chow, suggesting location specific differences in cholesterol metabolism and/or transport  
352 (**Figure 4I-J**). Furthermore, at a high magnification, we noticed accumulated cholesterol deposits in  
353 brain sections only of CETPtg mice on the cholesterol diet (**Figure 4H**).

354

### 355 **Transcriptional changes in CETPtg brains induced by presenilins**

356 To investigate whether the increased brain cholesterol levels are a result of changes in the  
357 transcription of genes that induce cholesterol synthesis, we performed a microarray from purified  
358 astrocyte mRNA (**Figure 5**). The two extreme conditions of lowest and highest cholesterol content in  
359 the brain were chosen (i.e., wt mice on a control diet compared to CETPtg mice on cholesterol diet  
360 resulting in a ~25% cholesterol increase, (**Figure 4D, J**)). Cells positive for the glutamate aspartate  
361 transporter (GLAST), a specific marker of astrocytes, were enriched from freshly dissected and  
362 dissociated whole brains using the ACSA-1 MicroBead Kit. To verify the enrichment of astrocytes,  
363 approximately  $8 \times 10^5$  cells were stained for the astrocyte marker, glial fibrillary acidic protein (GFAP),  
364 and analysed by flow cytometry revealing a purity of more than 80% across all samples (**Figure 5A**).  
365 Of note, there may be basal expression of GLAST in some neurons (39). Using total purified mRNA,  
366 CETP expression was validated in the astrocyte mRNA by qPCR (**Figure 5B**) and astrocyte  
367 transcripts were analysed on a Clariom S microarray. 595 genes were significantly up and 431 genes  
368 significantly down regulated at a threshold level of 1.5-fold change (**Figure 5C, D**). Interestingly,  
369 genes involved in cholesterol or lipid synthesis were not among the most differentially regulated genes  
370 (**Figure 5E**). In fact, such genes were downregulated such as HMGCR (1.57-fold down), SREBF1  
371 (1.71-fold down), SREBF2 (1.84-fold down), and mevalonate kinase (MVK, 1.42-fold down). In

372 addition, mRNA levels of LDLR and LRP1 were reduced (**Figure 5E**). Overall, this data implies that it  
373 is unlikely that increased *de novo* cholesterol synthesis is responsible for the elevated cholesterol  
374 levels in CETP<sup>tg</sup> mice.

375 Since we were interested to reveal if mice with humanised cholesterol metabolism show changes in  
376 the brain relevant to Alzheimer's disease, we analysed the effect of CETP on genes linked to  
377 Alzheimer's (**Figure 5F**). Seven genes were identified to be differentially expressed: Upregulated  
378 genes included 1) the prime Alzheimer's risk gene apolipoprotein E (ApoE, 1.57-fold up) involved in  
379 lipid transport, which is interesting since several epidemiological studies suggested an interaction  
380 between CETP and ApoE in the context of Alzheimer's disease (16,18); 2) The angiotensin-converting  
381 enzyme (ACE, 2.03-fold up) producing the vasoconstrictor angiotensin II, which is upregulated and  
382 implicated in hypoperfusion in Alzheimer's disease (40); 3) Caspase-8 (CASP8, 1.53-fold up) as a  
383 part of the apoptotic machinery, for which polymorphisms have been associated with Alzheimer's  
384 disease (41,42); and 4) IL1 $\beta$  (1.46-fold up), an inflammatory cytokine that is elevated in Alzheimer's  
385 disease brains (43). Downregulated genes included 5) the insulin-degrading enzyme (IDE, 1.51-fold  
386 down), which has been implicated in the degradation of A $\beta$  peptides and was associated with sporadic  
387 Alzheimer's disease (44); 6) TREM2 (2.34-fold down), which has been genetically linked to  
388 Alzheimer's disease, acts as a lipoprotein receptor and has been intensively studied in activated  
389 microglia (33). 7) Sortilin-related receptor 1 (SORL1, 1.42-fold down), which was described to shuttle  
390 APP away from subcellular locations of A $\beta$  production (45). Together, all these changes are in line  
391 with pathological changes in Alzheimer's disease and imply that due to the presence of CETP several  
392 molecular changes co-occur. Next, we performed an upstream-regulator analysis, which identifies  
393 common regulators that may account for the overall changes in mRNA expression in the dataset. The  
394 top upstream regulator was the prostaglandin E2 EP4 subtype (*PTGER4*) as 24 downstream targets  
395 of *PTGER4* were differentially regulated (**Figure 5G**). *PTGER4* encodes for a G-protein coupled  
396 receptor that binds prostaglandin E2 (PGE<sub>2</sub>) and has been associated with neurotoxicity and  
397 neuroinflammation (45,46). Most interestingly, the second and third hit of upstream regulators are

398 presenilin-1 and -2 (PSEN1 and PSEN2), the catalytic subunits of  $\gamma$ -secretase, an important protease  
399 in the etiology of Alzheimer's disease, which cleaves multiple substrates and is responsible for  
400 generating A $\beta$  peptides. Presenilin-1 and -2 were identified by 21 and 14 known downstream target  
401 genes, respectively (**Figure 5G**). To validate the expression changes found for these target genes at  
402 the protein level, we performed immunohistochemistry on hippocampal sections for one of our major  
403 hits, the initiating factor of the classical complement cascade, C1q. All genes coding for C1q protein  
404 are downstream to PSEN1 and PSEN2 and are significantly upregulated (C1qA: 3.48-fold change,  
405 C1qB: 1.55-fold change and C1qC: 2.1-fold change). Moreover, C1q is an important marker of  
406 neurodegeneration and contributes to synapse loss in Alzheimer's disease (47,48).  
407 Immunohistochemistry for C1q protein revealed a significant increase in C1q protein expression  
408 throughout the hippocampus of high cholesterol-fed CETP<sup>tg</sup> mice compared to wt and CETP<sup>tg</sup> mice  
409 on a normal diet (**Figure 5H-I**). Overall, our results suggest that the presence of CETP and the  
410 subsequently 'humanised' cholesterol transport activates presenilin signaling and the complement  
411 system in the mouse brain.

412

### 413 **CETP activates $\gamma$ -secretase**

414 Given the elevated brain cholesterol levels and the associated stimulation of  $\gamma$ -secretase-mediated  
415 signalling, we investigated if CETP activity stimulates  $\gamma$ -secretase activity *in vitro*. To this end, we took  
416 advantage of a well-known  $\gamma$ -secretase substrate, notch. Once the notch intracellular domain has  
417 been released by  $\gamma$ -secretase, it activates transcription of notch target genes, i.e., HES1 (Hes Family  
418 BHLH transcription factor 1) and p21 (cyclin dependent kinase inhibitor 1A) (49). We therefore  
419 expressed CETP or an inactive CETP mutant (L457/M459W (50)) in HEK293T cells and determined  
420  $\gamma$ -secretase activity by quantifying notch-target gene expression by qPCR (**Figure 6A, B**). Indeed,  
421 active CETP increased HES1 and p21 expression, whereas the catalytically inactive CETP had no  
422 effect (**Figure 6B**). The data shows that CETP activity causes cellular changes that stimulate  $\gamma$ -  
423 secretase activity *in vitro* and *in vivo*.

424 **Discussion**

425 ***CETP-mediated increase in brain cholesterol***

426 In this study, we aimed to understand effects of CETP on brain lipid composition and gene regulation.  
427 Based on our analysis, CETP<sup>tg</sup> mice show a lipoprotein profile in the blood that resembles much  
428 better the human lipoprotein profile and importantly shows a ~25% increase in brain cholesterol levels  
429 as compared to wt. To our knowledge, this is the first report of a transgenic mouse model showing  
430 elevated cholesterol levels to this extent. Some CETP<sup>tg</sup> mice on the cholesterol diet showed  
431 peripheral inflammation, but no elevated cytokine levels in total cortical mRNA, except for IL-1 $\beta$  at 5  
432 months of age and after a 3-month long 1% cholesterol diet. The enhanced inflammatory response in  
433 liver and plasma could be attributed to higher cholesterol levels in immune cells where it was already  
434 demonstrated that cholesterol augments, for instance, TLR receptor signalling, and modulates  
435 immune cells surrounding tumors (51,52). Interestingly, most of the changed gene expression in  
436 astrocytes related to inflammatory or immune-related genes. We focused on the complement factor  
437 C1q, which is elevated in CETP<sup>tg</sup> mice on a high cholesterol diet as compared to controls (**Figure**  
438 **5H, I**). C1q is being increasingly discussed in the context of Alzheimer's disease (53). C1q was  
439 originally viewed as the initiating component of the classical complement pathway. However, there is  
440 increasing evidence that suggests various complement-independent roles for C1q in innate and  
441 acquired immunity, as well as neuronal plasticity (54). As such, C1q mediates synapse pruning and  
442 it is also associated with neuroprotective effects such as the upregulation of cholesterol metabolizing  
443 genes and decreasing cellular cholesterol content (47,55). Thus, the elevated C1q levels in CETP<sup>tg</sup>  
444 mice could be a reaction to the elevated cholesterol levels aiming to eliminate excess cholesterol from  
445 the brain.

446

447 We investigated if the increase of brain cholesterol arises from *de novo* synthesis in the brain, which  
448 we could *not* confirm by transcriptome analysis. The elevated cholesterol levels may be explained by  
449 one of the following alternative pathways. While most lipoprotein particles cannot cross the blood-



450 brain barrier, some lipid exchange between the brain and the blood can occur (2,56,57). It is well  
451 established that beneficial dietary w3-fatty acids enter the brain (58,59). In addition, 24S- and 27-  
452 hydroxysterols efficiently cross the blood-brain barrier and polymorphisms in 24S-hydroxylase were  
453 associated with Alzheimer's Disease (2,60). Lastly, HDL particles were described to be capable of  
454 transporting cholesterol into the brain via scavenger-receptor mediated transport or transcytosis  
455 (61,62). In addition, the function of CETP in the brain remains unclear. While CETP shuttles  
456 cholesterol between HDL and VLDL in the blood, those lipoprotein particles do not exist in the brain  
457 (7). In the brain, ApoE is the predominant lipoprotein and most lipoprotein particles are HDL-like in  
458 size and decorated with ApoE or ApoJ (8,63). While a role for CETP in the brain is not clear, it is likely  
459 that it is active as a lipid transporter. However, the interaction partners may differ, and it is a possibility  
460 that CETP is involved in cholesterol redistribution between cells or acts as intracellular shuttle  
461 between organelles. Further, CETP may be involved in the storage of lipids in microglia and  
462 astrocytes. In this line, the Morton laboratory reported a role of CETP in lipid droplet formation (64,65).  
463 We observed cholesterol accumulations in CETP<sup>tg</sup> mice on a high cholesterol diet (**Figure 4H**),  
464 however, we could not determine the exact nature of such accumulations. Consequently, it is possible  
465 that lifetime exposure to CETP activity in the brain may cause an overall retention of cholesterol in  
466 the brain, leading to increased cholesterol levels observed in CETP<sup>tg</sup> mice on either diet. It will be  
467 most interesting to reveal if blood-derived CETP, centrally expressed CETP, or both are responsible  
468 for the molecular changes of the brain described herein.

469  
470 In the liver of CETP<sup>tg</sup> mice, we observed an upregulation of ABCA7 and TREM2 as compared to wt  
471 mice. TREM2 mutations associate with Alzheimer's disease, and it was thus far discussed as an  
472 immune receptor in the brain, but it also acts as a lipoprotein receptor, particularly for ApoE-containing  
473 particles (66-68). However, two recent manuscripts linked ABCA7 and TREM2 to bile acid formation  
474 in the liver (69,70). Thus, the elevated ABCA7 and TREM2 levels in CETP<sup>tg</sup> mice on cholesterol diet



475 in the liver may reflect an increase in bile acid formation. It is tempting to speculate that ABCA7 and  
476 TREM2 may be involved in cholesterol transport or redistribution in the brain.

477

#### 478 ***Several Alzheimer-related changes are triggered in CETP<sup>tg</sup> mice***

479 Alzheimer's disease is the most common form of dementia and defined by the occurrence of amyloid  
480 plaques composed of A $\beta$  peptides. A $\beta$  peptides are generated from the amyloid precursor protein  
481 (APP) through two subsequent proteolytic cleavages. First, the ectodomain of APP is removed by  $\beta$ -  
482 secretase and then the membrane-bound C-terminal fragment is cleaved by  $\gamma$ -secretase (71-73). It is  
483 well established that higher cellular levels of cholesterol stimulate  $\beta$ - and  $\gamma$ -secretase activity (74-78).  
484 To date, the physiological function of APP as well as the trigger that leads to A $\beta$  production remains  
485 unclear. However, it is evident that cellular pathways that stimulate A $\beta$  production could qualify as the  
486 underlying mechanism leading to Alzheimer's disease. The CETP<sup>tg</sup> mice analysed herein show a  
487 'humanised' cholesterol metabolism but are not causatively linked to Alzheimer's disease. Curiously,  
488 the cerebral changes that we observed (high cholesterol levels, transcriptional changes,  $\gamma$ -secretase  
489 activity) resemble changes that have previously been described in Alzheimer's disease. The upstream  
490 regulator analysis of the microarray revealed the prostaglandin E<sub>2</sub> receptor EP4 (gene name  
491 PTGER4) as the most significant upstream regulator (**Figure 5G**). In the brain, the EP4 receptor binds  
492 prostaglandin E<sub>2</sub> (PGE<sub>2</sub>) a key inflammatory mediator in response to circulating IL1 $\beta$  matching our  
493 observations of EP4 as top upstream regulator (79). However, its role in mediating an inflammatory  
494 response is not completely clear as PGE<sub>2</sub> can have both pro- and anti-inflammatory effects (80-83).  
495 Yet, multiple studies have linked activation of EP4 with an increase in A $\beta$  peptides and memory loss  
496 in the context of Alzheimer's disease (84,85). Such effects may be explained rather through stimulated  
497  $\gamma$ -secretase activity than through conventional G-protein coupled receptor signalling. Hoshino *et. al*  
498 show that upon stimulation with PGE<sub>2</sub>, EP4 is co-internalised with  $\gamma$ -secretase to endosomal and  
499 lysosomal compartments where  $\gamma$ -secretase activity is elevated (86). Such detrimental effects were  
500 abolished in EP4 knock-out animals or through pharmacological inhibition of EP4 (84). In line with this

501 mechanism, activation of  $\gamma$ -secretase activity was indeed observed as second and third top upstream  
502 regulators identified in CETP<sup>tg</sup> mice (**Figure 5G**).  $\gamma$ -Secretase activity is stimulated by membrane  
503 cholesterol and co-internalization with EP4 (74,87). It is important to note that while it has been well  
504 established that EP4 internalization occurs upon PGE<sub>2</sub> binding, the receptor also carries a cholesterol  
505 consensus motif and directly senses changes in cellular cholesterol levels (88). Interestingly,  
506 expression of CETP in cell culture models is already sufficient to increase  $\gamma$ -secretase activity.  
507 Consequently, it is likely that the effects on presenilins/ $\gamma$ -secretase are downstream of the elevated  
508 cholesterol levels in the brain. The altered cholesterol transport, at least in the CETP<sup>tg</sup> model  
509 presented here, drives multiple molecular changes that recapitulate changes already described in  
510 Alzheimer's disease, suggesting that a deregulation of cholesterol homeostasis may underlie  
511 Alzheimer's disease pathology (**Figure 6C**).

512

513 Lipidomic studies have found that abnormal plasma lipid profiles, and consequently abnormal lipid  
514 biomarker panels, yield specific markers of Alzheimer's disease (89-91). However, most animal  
515 models focus on overexpression of mutated forms of human APP, presenilin or tau, involved in a  
516 further hallmark pathology of Alzheimer's disease. All these mouse models have low levels of  
517 circulating LDL due to the lack of CETP and therefore do not report on the impact of cholesterol  
518 transport on Alzheimer's pathology, which may have been underestimated thus far (22). Here, we  
519 report that mice expressing human CETP exhibit elevated levels of cholesterol in the brain. In the  
520 absence of APP or presenilin overexpression, CETP<sup>tg</sup> mice show a transcriptional profile that reflects  
521 a multitude of changes previously described in the Alzheimer's disease. Taken together, our data  
522 suggest that a mouse model expressing CETP and APP will be a valuable tool to unravel the  
523 molecular mechanisms between the peripheral and central cholesterol metabolism, ApoE and  
524 Alzheimer's disease.

525

526

527 **Acknowledgements**

528 We thank Dr. Bernard Robaire for Affymetrix software support to evaluate the microarray data,  
529 Elizabeth-Ann Kranjec for initial MALDI IMS measures, and Dr. Sandra Paschkowsky and Sasen  
530 Efreem for valuable feedback on the manuscript.

531

532 **Author contribution**

533 FO performed and analysed all experiments presented here with the exception of the MALDI IMS  
534 data that were acquired and analyzed by EY supervised by PC, and fillipin and C1q stains that were  
535 performed by NY supervised by ARdS. LMM designed the project. FO wrote draft, LMM, NY, PC, and  
536 EY edited and revised the manuscript. All Authors approved the manuscript for publication.

537

538 **Conflict of interest**

539 The authors declare no competing financial interests.

540

541 **References**

- 542 1. Dietschy, J. (2009) Central nervous system: cholesterol turnover, brain development and  
543 neurodegeneration. *Biol Chem* **390**, 287-293
- 544 2. Bjorkhem, I., and Meaney, S. (2004) Brain cholesterol: long secret life behind a barrier.  
545 *Arterioscler Thromb Vasc Biol* **24**, 806-815
- 546 3. Yao, Z., and McLeod, R. S. (1994) Synthesis and secretion of hepatic apolipoprotein B-  
547 containing lipoproteins. *Biochim Biophys Acta* **1212**, 152-166
- 548 4. Glomset, J. A. (1980) High-density lipoproteins in human health and disease. *Adv Intern Med*  
549 **25**, 91-116
- 550 5. Liu, M., Kuhel, D. G., Shen, L., Hui, D. Y., and Woods, S. C. (2012) Apolipoprotein E does not  
551 cross the blood-cerebrospinal fluid barrier, as revealed by an improved technique for sampling  
552 CSF from mice. *Am J Physiol Regul Integr Comp Physiol* **303**, R903-908

- 553 6. Vance, J. (2012) Dysregulation of cholesterol balance in the brain: contribution to  
554 neurodegenerative diseases. *Dis Model Mech* **5**, 746-755
- 555 7. Vance, J., Hayashi, H., and Karten, B. (2005) Cholesterol homeostasis in neurons and glial  
556 cells. *Semin Cell Dev Biol* **16**, 193-212
- 557 8. Vance, J. E., and Hayashi, H. (2010) Formation and function of apolipoprotein E-containing  
558 lipoproteins in the nervous system. *Biochim Biophys Acta* **1801**, 806-818
- 559 9. Holtzman, D., Herz, J., and Bu, G. (2012) Apolipoprotein e and apolipoprotein e receptors:  
560 normal biology and roles in Alzheimer disease. *Cold Spring Harb Perspect Med* **2**, a006312
- 561 10. Zilversmit, D. B., Hughes, L. B., and Balmer, J. (1975) Stimulation of cholesterol ester  
562 exchange by lipoprotein-free rabbit plasma. *Biochim Biophys Acta* **409**, 393-398
- 563 11. Chajek, T., and Fielding, C. J. (1978) Isolation and characterization of a human serum  
564 cholesteryl ester transfer protein. *Proc Natl Acad Sci U S A* **75**, 3445-3449
- 565 12. Lagrost, L. (1994) Regulation of cholesteryl ester transfer protein (CETP) activity: review of in  
566 vitro and in vivo studies. *Biochim Biophys Acta* **1215**, 209-236
- 567 13. Zhong, S., Sharp, D. S., Grove, J. S., Bruce, C., Yano, K., Curb, J. D., and Tall, A. R. (1996)  
568 Increased coronary heart disease in Japanese-American men with mutation in the cholesteryl  
569 ester transfer protein gene despite increased HDL levels. *J Clin Invest* **97**, 2917-2923
- 570 14. Barzilai, N., Atzmon, G., Derby, C., Bauman, J., and Lipton, R. (2006) A genotype of  
571 exceptional longevity is associated with preservation of cognitive function. *Neurology* **67**,  
572 2170-2175
- 573 15. Barzilai, N., Atzmon, G., Schechter, C., Schaefer, E., Cupples, A., Lipton, R., Cheng, S., and  
574 Shuldiner, A. (2003) Unique lipoprotein phenotype and genotype associated with exceptional  
575 longevity. *JAMA* **290**, 2030-2040
- 576 16. Rodriguez, E., Mateo, I., Infante, J., Llorca, J., Berciano, J., and Combarros, O. (2006)  
577 Cholesteryl ester transfer protein (CETP) polymorphism modifies the Alzheimer's disease risk  
578 associated with APOE epsilon4 allele. *J Neurol* **253**, 181-185

- 579 17. Sanders, A., Wang, C., Katz, M., Derby, C., Barzilai, N., Ozelius, L., and Lipton, R. (2010)  
580 Association of a functional polymorphism in the cholesteryl ester transfer protein (CETP) gene  
581 with memory decline and incidence of dementia. *JAMA* **303**, 150-158
- 582 18. Sundermann, E. E., Wang, C., Katz, M., Zimmerman, M. E., Derby, C. A., Hall, C. B., Ozelius,  
583 L. J., and Lipton, R. B. (2016) Cholesteryl ester transfer protein genotype modifies the effect  
584 of apolipoprotein epsilon4 on memory decline in older adults. *Neurobiol Aging* **41**, 200 e207-  
585 200 e212
- 586 19. Murphy, E. A., Roddey, J. C., McEvoy, L. K., Holland, D., Hagler, D. J., Jr., Dale, A. M., Brewer,  
587 J. B., and Alzheimer's Disease Neuroimaging, I. (2012) CETP polymorphisms associate with  
588 brain structure, atrophy rate, and Alzheimer's disease risk in an APOE-dependent manner.  
589 *Brain Imaging Behav* **6**, 16-26
- 590 20. Wang, H., and Eckel, R. H. (2014) What are lipoproteins doing in the brain? *Trends Endocrinol*  
591 *Metab* **25**, 8-14
- 592 21. Yamada, T., Kawata, M., Arai, H., Fukasawa, M., Inoue, K., and Sato, T. (1995) Astroglial  
593 localization of cholesteryl ester transfer protein in normal and Alzheimer's disease brain  
594 tissues. *Acta Neuropathol* **90**, 633-636
- 595 22. Steenbergen, R. H., Joyce, M. A., Lund, G., Lewis, J., Chen, R., Barsby, N., Douglas, D., Zhu,  
596 L. F., Tyrrell, D. L., and Kneteman, N. M. (2010) Lipoprotein profiles in SCID/uPA mice  
597 transplanted with human hepatocytes become human-like and correlate with HCV infection  
598 success. *Am J Physiol Gastrointest Liver Physiol* **299**, G844-854
- 599 23. Jiang, X., Agellon, L., Walsh, A., Breslow, J., and Tall, A. (1992) Dietary cholesterol increases  
600 transcription of the human cholesteryl ester transfer protein gene in transgenic mice.  
601 Dependence on natural flanking sequences. *J Clin Invest* **90**, 1290-1295
- 602 24. Gauthier, B., Robb, M., Gaudet, F., Ginsburg, G. S., and McPherson, R. (1999)  
603 Characterization of a cholesterol response element (CRE) in the promoter of the cholesteryl

- 604 ester transfer protein gene: functional role of the transcription factors SREBP-1a, -2, and YY1.  
605 *J Lipid Res* **40**, 1284-1293
- 606 25. Groseclose, M. R., and Castellino, S. (2013) A mimetic tissue model for the quantification of  
607 drug distributions by MALDI imaging mass spectrometry. *Anal Chem* **85**, 10099-10106
- 608 26. Dufresne, M., Thomas, A., Breault-Turcot, J., Masson, J. F., and Chaurand, P. (2013) Silver-  
609 assisted laser desorption ionization for high spatial resolution imaging mass spectrometry of  
610 olefins from thin tissue sections. *Anal Chem* **85**, 3318-3324
- 611 27. Schramm, T., Hester, Z., Klinkert, I., Both, J. P., Heeren, R. M. A., Brunelle, A., Laprevote, O.,  
612 Desbenoit, N., Robbe, M. F., Stoekli, M., Spengler, B., and Rompp, A. (2012) imzML--a  
613 common data format for the flexible exchange and processing of mass spectrometry imaging  
614 data. *J Proteomics* **75**, 5106-5110
- 615 28. Bemis, K. D., Harry, A., Eberlin, L. S., Ferreira, C., van de Ven, S. M., Mallick, P., Stolowitz,  
616 M., and Vitek, O. (2015) Cardinal: an R package for statistical analysis of mass spectrometry-  
617 based imaging experiments. *Bioinformatics* **31**, 2418-2420
- 618 29. Brown, M. S., Ye, J., Rawson, R. B., and Goldstein, J. L. (2000) Regulated intramembrane  
619 proteolysis: a control mechanism conserved from bacteria to humans. *Cell* **100**, 391-398
- 620 30. Llorente-Cortes, V., Costales, P., Bernues, J., Camino-Lopez, S., and Badimon, L. (2006)  
621 Sterol regulatory element-binding protein-2 negatively regulates low density lipoprotein  
622 receptor-related protein transcription. *J Mol Biol* **359**, 950-960
- 623 31. Wang, Y., Cella, M., Mallinson, K., Ulrich, J. D., Young, K. L., Robinette, M. L., Gilfillan, S.,  
624 Krishnan, G. M., Sudhakar, S., Zinselmeier, B. H., Holtzman, D. M., Cirrito, J. R., and  
625 Colonna, M. (2015) TREM2 lipid sensing sustains the microglial response in an Alzheimer's  
626 disease model. *Cell* **160**, 1061-1071
- 627 32. Hollingworth, P., Harold, D., Sims, R., Gerrish, A., Lambert, J. C., Carrasquillo, M. M.,  
628 Abraham, R., Hamshere, M. L., Pahwa, J. S., Moskvina, V., Dowzell, K., Jones, N., Stretton,  
629 A., Thomas, C., Richards, A., Ivanov, D., Widdowson, C., Chapman, J., Lovestone, S., Powell,

630 J., Proitsi, P., Lupton, M. K., Brayne, C., Rubinsztein, D. C., Gill, M., Lawlor, B., Lynch, A.,  
631 Brown, K. S., Passmore, P. A., Craig, D., McGuinness, B., Todd, S., Holmes, C., Mann, D.,  
632 Smith, A. D., Beaumont, H., Warden, D., Wilcock, G., Love, S., Kehoe, P. G., Hooper, N. M.,  
633 Vardy, E. R., Hardy, J., Mead, S., Fox, N. C., Rossor, M., Collinge, J., Maier, W., Jessen, F.,  
634 Ruther, E., Schurmann, B., Heun, R., Kolsch, H., van den Bussche, H., Heuser, I., Kornhuber,  
635 J., Wiltfang, J., Dichgans, M., Frolich, L., Hampel, H., Gallacher, J., Hull, M., Rujescu, D.,  
636 Giegling, I., Goate, A. M., Kauwe, J. S., Cruchaga, C., Nowotny, P., Morris, J. C., Mayo, K.,  
637 Sleegers, K., Bettens, K., Engelborghs, S., De Deyn, P. P., Van Broeckhoven, C., Livingston,  
638 G., Bass, N. J., Gurling, H., McQuillin, A., Gwilliam, R., Deloukas, P., Al-Chalabi, A., Shaw, C.  
639 E., Tsolaki, M., Singleton, A. B., Guerreiro, R., Muhleisen, T. W., Nothen, M. M., Moebus, S.,  
640 Jockel, K. H., Klopp, N., Wichmann, H. E., Pankratz, V. S., Sando, S. B., Aasly, J. O.,  
641 Barcikowska, M., Wszolek, Z. K., Dickson, D. W., Graff-Radford, N. R., Petersen, R. C.,  
642 Alzheimer's Disease Neuroimaging, I., van Duijn, C. M., Breteler, M. M., Ikram, M. A.,  
643 DeStefano, A. L., Fitzpatrick, A. L., Lopez, O., Launer, L. J., Seshadri, S., consortium, C., Berr,  
644 C., Champion, D., Epelbaum, J., Dartigues, J. F., Tzourio, C., Alperovitch, A., Lathrop, M.,  
645 consortium, E., Feulner, T. M., Friedrich, P., Riehle, C., Krawczak, M., Schreiber, S., Mayhaus,  
646 M., Nicolhaus, S., Wagenpfeil, S., Steinberg, S., Stefansson, H., Stefansson, K., Snaedal, J.,  
647 Bjornsson, S., Jonsson, P. V., Chouraki, V., Genier-Boley, B., Hiltunen, M., Soininen, H.,  
648 Combarros, O., Zelenika, D., Delepine, M., Bullido, M. J., Pasquier, F., Mateo, I., Frank-  
649 Garcia, A., Porcellini, E., Hanon, O., Coto, E., Alvarez, V., Bosco, P., Siciliano, G., Mancuso,  
650 M., Panza, F., Solfrizzi, V., Nacmias, B., Sorbi, S., Bossu, P., Piccardi, P., Arosio, B., Annoni,  
651 G., Seripa, D., Pilotto, A., Scarpini, E., Galimberti, D., Brice, A., Hannequin, D., Licastro, F.,  
652 Jones, L., Holmans, P. A., Jonsson, T., Riemenschneider, M., Morgan, K., Younkin, S. G.,  
653 Owen, M. J., O'Donovan, M., Amouyel, P., and Williams, J. (2011) Common variants at  
654 ABCA7, MS4A6A/MS4A4E, EPHA1, CD33 and CD2AP are associated with Alzheimer's  
655 disease. *Nat Genet* **43**, 429-435



- 656 33. Guerreiro, R., Wojtas, A., Bras, J., Carrasquillo, M., Rogaeva, E., Majounie, E., Cruchaga, C.,  
657 Sassi, C., Kauwe, J. S., Younkin, S., Hazrati, L., Collinge, J., Pocock, J., Lashley, T., Williams,  
658 J., Lambert, J. C., Amouyel, P., Goate, A., Rademakers, R., Morgan, K., Powell, J., St George-  
659 Hyslop, P., Singleton, A., Hardy, J., and Alzheimer Genetic Analysis, G. (2013) TREM2  
660 variants in Alzheimer's disease. *N Engl J Med* **368**, 117-127
- 661 34. Iwamoto, N., Abe-Dohmae, S., Sato, R., and Yokoyama, S. (2006) ABCA7 expression is  
662 regulated by cellular cholesterol through the SREBP2 pathway and associated with  
663 phagocytosis. *J Lipid Res* **47**, 1915-1927
- 664 35. Wouters, K., van Gorp, P. J., Bieghs, V., Gijbels, M. J., Duimel, H., Lutjohann, D., Kerksiek,  
665 A., van Kruchten, R., Maeda, N., Staels, B., van Bilsen, M., Shiri-Sverdlov, R., and Hofker, M.  
666 H. (2008) Dietary cholesterol, rather than liver steatosis, leads to hepatic inflammation in  
667 hyperlipidemic mouse models of nonalcoholic steatohepatitis. *Hepatology* **48**, 474-486
- 668 36. Muller, N., Schulte, D. M., Turk, K., Freitag-Wolf, S., Hampe, J., Zeuner, R., Schroder, J. O.,  
669 Gouni-Berthold, I., Berthold, H. K., Krone, W., Rose-John, S., Schreiber, S., and Laudes, M.  
670 (2015) IL-6 blockade by monoclonal antibodies inhibits apolipoprotein (a) expression and  
671 lipoprotein (a) synthesis in humans. *J Lipid Res* **56**, 1034-1042
- 672 37. Thomas, A., Charbonneau, J. L., Fournaise, E., and Chaurand, P. (2012) Sublimation of new  
673 matrix candidates for high spatial resolution imaging mass spectrometry of lipids: enhanced  
674 information in both positive and negative polarities after 1,5-diaminonaphthalene deposition.  
675 *Anal Chem* **84**, 2048-2054
- 676 38. Caughlin, S., Park, D. H., Yeung, K. K., Cechetto, D. F., and Whitehead, S. N. (2017)  
677 Sublimation of DAN Matrix for the Detection and Visualization of Gangliosides in Rat Brain  
678 Tissue for MALDI Imaging Mass Spectrometry. *J Vis Exp*
- 679 39. Rothstein, J. D., Martin, L., Levey, A. I., Dykes-Hoberg, M., Jin, L., Wu, D., Nash, N., and  
680 Kuncl, R. W. (1994) Localization of neuronal and glial glutamate transporters. *Neuron* **13**, 713-  
681 725



- 682 40. Love, S., and Miners, J. S. (2016) Cerebral Hypoperfusion and the Energy Deficit in  
683 Alzheimer's Disease. *Brain Pathol* **26**, 607-617
- 684 41. Rohn, T. T., Head, E., Nesse, W. H., Cotman, C. W., and Cribbs, D. H. (2001) Activation of  
685 caspase-8 in the Alzheimer's disease brain. *Neurobiol Dis* **8**, 1006-1016
- 686 42. Rehker, J., Rodhe, J., Nesbitt, R. R., Boyle, E. A., Martin, B. K., Lord, J., Karaca, I., Naj, A.,  
687 Jessen, F., Helisalmi, S., Soininen, H., Hiltunen, M., Ramirez, A., Scherer, M., Farrer, L. A.,  
688 Haines, J. L., Pericak-Vance, M. A., Raskind, W. H., Cruchaga, C., Schellenberg, G. D.,  
689 Joseph, B., and Brkanac, Z. (2017) Caspase-8, association with Alzheimer's Disease and  
690 functional analysis of rare variants. *PLoS One* **12**, e0185777
- 691 43. Griffin, W. S., Stanley, L. C., Ling, C., White, L., MacLeod, V., Perrot, L. J., White, C. L., 3rd,  
692 and Araoz, C. (1989) Brain interleukin 1 and S-100 immunoreactivity are elevated in Down  
693 syndrome and Alzheimer disease. *Proc Natl Acad Sci U S A* **86**, 7611-7615
- 694 44. Qiu, W. Q., Walsh, D. M., Ye, Z., Vekrellis, K., Zhang, J., Podlisny, M. B., Rosner, M. R.,  
695 Safavi, A., Hersh, L. B., and Selkoe, D. J. (1998) Insulin-degrading enzyme regulates  
696 extracellular levels of amyloid beta-protein by degradation. *J Biol Chem* **273**, 32730-32738
- 697 45. Andersen, O. M., Reiche, J., Schmidt, V., Gotthardt, M., Spoelgen, R., Behlke, J., von Arnim,  
698 C. A., Breiderhoff, T., Jansen, P., Wu, X., Bales, K. R., Cappai, R., Masters, C. L., Gliemann,  
699 J., Mufson, E. J., Hyman, B. T., Paul, S. M., Nykjaer, A., and Willnow, T. E. (2005) Neuronal  
700 sorting protein-related receptor sorLA/LR11 regulates processing of the amyloid precursor  
701 protein. *Proc Natl Acad Sci U S A* **102**, 13461-13466
- 702 46. Fujikawa, R., Higuchi, S., Nakatsuji, M., Yasui, M., Ikedo, T., Nagata, M., Hayashi, K., Yokode,  
703 M., and Minami, M. (2017) Deficiency in EP4 Receptor-Associated Protein Ameliorates  
704 Abnormal Anxiety-Like Behavior and Brain Inflammation in a Mouse Model of Alzheimer  
705 Disease. *Am J Pathol* **187**, 1848-1854
- 706 47. Hong, S., Beja-Glasser, V. F., Nfonoyim, B. M., Frouin, A., Li, S., Ramakrishnan, S., Merry, K.  
707 M., Shi, Q., Rosenthal, A., Barres, B. A., Lemere, C. A., Selkoe, D. J., and Stevens, B. (2016)

- 708 Complement and microglia mediate early synapse loss in Alzheimer mouse models. *Science*  
709 **352**, 712-716
- 710 48. Afagh, A., Cummings, B. J., Cribbs, D. H., Cotman, C. W., and Tenner, A. J. (1996)  
711 Localization and cell association of C1q in Alzheimer's disease brain. *Exp Neurol* **138**, 22-32
- 712 49. Jarriault, S., Brou, C., Logeat, F., Schroeter, E. H., Kopan, R., and Israel, A. (1995) Signalling  
713 downstream of activated mammalian Notch. *Nature* **377**, 355-358
- 714 50. Qiu, X., Mistry, A., Ammirati, M., Chrnyk, B., Clark, R., Cong, Y., Culp, J., Danley, D.,  
715 Freeman, T., Geoghegan, K., Griffor, M., Hawrylik, S., Hayward, C., Hensley, P., Hoth, L.,  
716 Karam, G., Lira, M., Lloyd, D., McGrath, K., Stutzman-Engwall, K., Subashi, A., Subashi, T.,  
717 Thompson, J., Wang, I., Zhao, H., and Seddon, A. (2007) Crystal structure of cholesteryl ester  
718 transfer protein reveals a long tunnel and four bound lipid molecules. *Nat Struct Mol Biol* **14**,  
719 106-113
- 720 51. Yang, W., Bai, Y., Xiong, Y., Zhang, J., Chen, S., Zheng, X., Meng, X., Li, L., Wang, J., Xu,  
721 C., Yan, C., Wang, L., Chang, C. C., Chang, T. Y., Zhang, T., Zhou, P., Song, B. L., Liu, W.,  
722 Sun, S. C., Liu, X., Li, B. L., and Xu, C. (2016) Potentiating the antitumour response of CD8(+)  
723 T cells by modulating cholesterol metabolism. *Nature* **531**, 651-655
- 724 52. Tall, A. R., and Yvan-Charvet, L. (2015) Cholesterol, inflammation and innate immunity. *Nat*  
725 *Rev Immunol* **15**, 104-116
- 726 53. Reichwald, J., Danner, S., Wiederhold, K. H., and Staufenbiel, M. (2009) Expression of  
727 complement system components during aging and amyloid deposition in APP transgenic  
728 mice. *J Neuroinflammation* **6**, 35
- 729 54. Thielens, N. M., Tedesco, F., Bohlson, S. S., Gaboriaud, C., and Tenner, A. J. (2017) C1q: A  
730 fresh look upon an old molecule. *Mol Immunol* **89**, 73-83
- 731 55. Benoit, M. E., and Tenner, A. J. (2011) Complement protein C1q-mediated neuroprotection is  
732 correlated with regulation of neuronal gene and microRNA expression. *J Neurosci* **31**, 3459-  
733 3469

- 734 56. Bjorkhem, I., Lutjohann, D., Diczfalusy, U., Stahle, L., Ahlborg, G., and Wahren, J. (1998)  
735 Cholesterol homeostasis in human brain: turnover of 24S-hydroxycholesterol and evidence  
736 for a cerebral origin of most of this oxysterol in the circulation. *J Lipid Res* **39**, 1594-1600
- 737 57. Zlokovic, B. V. (2008) The blood-brain barrier in health and chronic neurodegenerative  
738 disorders. *Neuron* **57**, 178-201
- 739 58. Nguyen, L. N., Ma, D., Shui, G., Wong, P., Cazenave-Gassiot, A., Zhang, X., Wenk, M. R.,  
740 Goh, E. L., and Silver, D. L. (2014) Mfsd2a is a transporter for the essential omega-3 fatty acid  
741 docosahexaenoic acid. *Nature* **509**, 503-506
- 742 59. Ouellet, M., Emond, V., Chen, C. T., Julien, C., Bourasset, F., Oddo, S., LaFerla, F., Bazinet,  
743 R. P., and Calon, F. (2009) Diffusion of docosahexaenoic and eicosapentaenoic acids through  
744 the blood-brain barrier: An in situ cerebral perfusion study. *Neurochem Int* **55**, 476-482
- 745 60. Bjorkhem, I. (2006) Crossing the barrier: oxysterols as cholesterol transporters and metabolic  
746 modulators in the brain. *J Intern Med* **260**, 493-508
- 747 61. Balazs, Z., Panzenboeck, U., Hammer, A., Sovic, A., Quehenberger, O., Malle, E., and Sattler,  
748 W. (2004) Uptake and transport of high-density lipoprotein (HDL) and HDL-associated alpha-  
749 tocopherol by an in vitro blood-brain barrier model. *J Neurochem* **89**, 939-950
- 750 62. Stukas, S., Robert, J., Lee, M., Kulic, I., Carr, M., Tourigny, K., Fan, J., Namjoshi, D., Lemke,  
751 K., DeValle, N., Chan, J., Wilson, T., Wilkinson, A., Chapanian, R., Kizhakkedathu, J. N.,  
752 Cirrito, J. R., Oda, M. N., and Wellington, C. L. (2014) Intravenously injected human  
753 apolipoprotein A-I rapidly enters the central nervous system via the choroid plexus. *J Am Heart*  
754 *Assoc* **3**, e001156
- 755 63. Fagan, A. M., Holtzman, D. M., Munson, G., Mathur, T., Schneider, D., Chang, L. K., Getz, G.  
756 S., Reardon, C. A., Lukens, J., Shah, J. A., and LaDu, M. J. (1999) Unique lipoproteins  
757 secreted by primary astrocytes from wild type, apoE (-/-), and human apoE transgenic mice.  
758 *J Biol Chem* **274**, 30001-30007

- 759 64. Izem, L., and Morton, R. (2001) Cholesteryl ester transfer protein biosynthesis and cellular  
760 cholesterol homeostasis are tightly interconnected. *J Biol Chem* **276**, 26534-26541
- 761 65. Izem, L., and Morton, R. (2007) Possible role for intracellular cholesteryl ester transfer protein  
762 in adipocyte lipid metabolism and storage. *J Biol Chem* **282**, 21856-21865
- 763 66. Kober, D. L., Stuchell-Breton, M. D., Kluender, C. E., Dean, H. B., Strickland, M. R.,  
764 Steinberg, D. F., Nelson, S. S., Baban, B., Holtzman, D. M., Frieden, C., Alexander-Brett, J.,  
765 Roberson, E. D., Song, Y., and Brett, T. J. (2020) Functional insights from biophysical study  
766 of TREM2 interactions with apoE and Abeta1-42. *Alzheimers Dement*
- 767 67. Fitz, N. F., Wolfe, C. M., Playso, B. E., Biedrzycki, R. J., Lu, Y., Nam, K. N., Lefterov, I., and  
768 Koldamova, R. (2020) Trem2 deficiency differentially affects phenotype and transcriptome of  
769 human APOE3 and APOE4 mice. *Mol Neurodegener* **15**, 41
- 770 68. Li, Z., Del-Aguila, J. L., Dube, U., Budde, J., Martinez, R., Black, K., Xiao, Q., Cairns, N. J.,  
771 Dominantly Inherited Alzheimer, N., Dougherty, J. D., Lee, J. M., Morris, J. C., Bateman, R.  
772 J., Karch, C. M., Cruchaga, C., and Harari, O. (2018) Genetic variants associated with  
773 Alzheimer's disease confer different cerebral cortex cell-type population structure. *Genome*  
774 *Med* **10**, 43
- 775 69. MahmoudianDehkordi, S., Arnold, M., Nho, K., Ahmad, S., Jia, W., Xie, G., Louie, G., Kueider-  
776 Paisley, A., Moseley, M. A., Thompson, J. W., St John Williams, L., Tenenbaum, J. D., Blach,  
777 C., Baillie, R., Han, X., Bhattacharyya, S., Toledo, J. B., Schafferer, S., Klein, S., Koal, T.,  
778 Risacher, S. L., Kling, M. A., Motsinger-Reif, A., Rotroff, D. M., Jack, J., Hankemeier, T.,  
779 Bennett, D. A., De Jager, P. L., Trojanowski, J. Q., Shaw, L. M., Weiner, M. W., Doraiswamy,  
780 P. M., van Duijn, C. M., Saykin, A. J., Kastenmuller, G., Kaddurah-Daouk, R., Alzheimer's  
781 Disease Neuroimaging, I., and the Alzheimer Disease Metabolomics, C. (2019) Altered bile  
782 acid profile associates with cognitive impairment in Alzheimer's disease-An emerging role for  
783 gut microbiome. *Alzheimers Dement* **15**, 76-92

- 784 70. Nho, K., Kueider-Paisley, A., MahmoudianDehkordi, S., Arnold, M., Risacher, S. L., Louie, G.,  
785 Blach, C., Baillie, R., Han, X., Kastenmuller, G., Jia, W., Xie, G., Ahmad, S., Hankemeier, T.,  
786 van Duijn, C. M., Trojanowski, J. Q., Shaw, L. M., Weiner, M. W., Doraiswamy, P. M., Saykin,  
787 A. J., Kaddurah-Daouk, R., Alzheimer's Disease Neuroimaging, I., and the Alzheimer Disease  
788 Metabolomics, C. (2019) Altered bile acid profile in mild cognitive impairment and Alzheimer's  
789 disease: Relationship to neuroimaging and CSF biomarkers. *Alzheimers Dement* **15**, 232-244
- 790 71. Sinha, S., Anderson, J. P., Barbour, R., Basi, G. S., Caccavello, R., Davis, D., Doan, M.,  
791 Dovey, H. F., Frigon, N., Hong, J., Jacobson-Croak, K., Jewett, N., Keim, P., Knops, J.,  
792 Lieberburg, I., Power, M., Tan, H., Tatsuno, G., Tung, J., Schenk, D., Seubert, P.,  
793 Suomensaaari, S. M., Wang, S., Walker, D., Zhao, J., McConlogue, L., and John, V. (1999)  
794 Purification and cloning of amyloid precursor protein beta-secretase from human brain. *Nature*  
795 **402**, 537-540
- 796 72. Vassar, R., Bennett, B., Babu-Khan, S., Kahn, S., Mendiaz, E., Denis, P., Teplow, D., Ross,  
797 S., Amarante, P., Loeloff, R., Luo, Y., Fisher, S., Fuller, J., Edenson, S., Lile, J., Jarosinski,  
798 M., Biere, A., Curran, E., Burgess, T., Louis, J., Collins, F., Treanor, J., Rogers, G., and Citron,  
799 M. (1999) Beta-secretase cleavage of Alzheimer's amyloid precursor protein by the  
800 transmembrane aspartic protease BACE. *Science* **286**, 735-741
- 801 73. Zhao, G., Tan, J., Mao, G., Cui, M., and Xu, X. (2007) The same gamma-secretase accounts  
802 for the multiple intramembrane cleavages of APP. *J Neurochem* **100**, 1234-1246
- 803 74. Jung, J. I., Price, A. R., Ladd, T. B., Ran, Y., Park, H. J., Ceballos-Diaz, C., Smithson, L. A.,  
804 Hochhaus, G., Tang, Y., Akula, R., Ba, S., Koo, E. H., Shapiro, G., Felsenstein, K. M., and  
805 Golde, T. E. (2015) Cholestenoic acid, an endogenous cholesterol metabolite, is a potent  
806 gamma-secretase modulator. *Mol Neurodegener* **10**, 29
- 807 75. Osenkowski, P., Ye, W., Wang, R., Wolfe, M., and Selkoe, D. (2008) Direct and potent  
808 regulation of gamma-secretase by its lipid microenvironment. *J Biol Chem* **283**, 22529-22540

- 809 76. Das, U., Scott, D. A., Ganguly, A., Koo, E. H., Tang, Y., and Roy, S. (2013) Activity-induced  
810 convergence of APP and BACE-1 in acidic microdomains via an endocytosis-dependent  
811 pathway. *Neuron* **79**, 447-460
- 812 77. Grimm, M., Grimm, H., Tomic, I., Beyreuther, K., Hartmann, T., and Bergmann, C. (2008)  
813 Independent inhibition of Alzheimer disease beta- and gamma-secretase cleavage by lowered  
814 cholesterol levels. *J Biol Chem* **283**, 11302-11311
- 815 78. Hui, L., Chen, X., and Geiger, J. D. (2012) Endolysosome involvement in LDL cholesterol-  
816 induced Alzheimer's disease-like pathology in primary cultured neurons. *Life Sci* **91**, 1159-  
817 1168
- 818 79. Fujikawa, R., Higuchi, S., Nakatsuji, M., Yasui, M., Ikedo, T., Nagata, M., Yokode, M., and  
819 Minami, M. (2016) EP4 Receptor-Associated Protein in Microglia Promotes Inflammation in  
820 the Brain. *Am J Pathol* **186**, 1982-1988
- 821 80. Echeverria, V., Clerman, A., and Dore, S. (2005) Stimulation of PGE receptors EP2 and EP4  
822 protects cultured neurons against oxidative stress and cell death following beta-amyloid  
823 exposure. *Eur J Neurosci* **22**, 2199-2206
- 824 81. Woodling, N. S., and Andreasson, K. I. (2016) Untangling the Web: Toxic and Protective  
825 Effects of Neuroinflammation and PGE2 Signaling in Alzheimer's Disease. *ACS Chem*  
826 *Neurosci* **7**, 454-463
- 827 82. Shi, J., Johansson, J., Woodling, N. S., Wang, Q., Montine, T. J., and Andreasson, K. (2010)  
828 The prostaglandin E2 E-prostanoid 4 receptor exerts anti-inflammatory effects in brain innate  
829 immunity. *J Immunol* **184**, 7207-7218
- 830 83. Woodling, N. S., Wang, Q., Priyam, P. G., Larkin, P., Shi, J., Johansson, J. U., Zagol-Ikapitte,  
831 I., Boutaud, O., and Andreasson, K. I. (2014) Suppression of Alzheimer-associated  
832 inflammation by microglial prostaglandin-E2 EP4 receptor signaling. *J Neurosci* **34**, 5882-5894
- 833 84. Hoshino, T., Namba, T., Takehara, M., Murao, N., Matsushima, T., Sugimoto, Y., Narumiya,  
834 S., Suzuki, T., and Mizushima, T. (2012) Improvement of cognitive function in Alzheimer's

- 835 disease model mice by genetic and pharmacological inhibition of the EP(4) receptor. *J*  
836 *Neurochem* **120**, 795-805
- 837 85. Li, X., Montine, K. S., Keene, C. D., and Montine, T. J. (2015) Different mechanisms of  
838 apolipoprotein E isoform-dependent modulation of prostaglandin E2 production and triggering  
839 receptor expressed on myeloid cells 2 (TREM2) expression after innate immune activation of  
840 microglia. *FASEB J* **29**, 1754-1762
- 841 86. Hoshino, T., Namba, T., Takehara, M., Nakaya, T., Sugimoto, Y., Araki, W., Narumiya, S.,  
842 Suzuki, T., and Mizushima, T. (2009) Prostaglandin E2 stimulates the production of amyloid-  
843 beta peptides through internalization of the EP4 receptor. *J Biol Chem* **284**, 18493-18502
- 844 87. Marquer, C., Devauges, V., Cossec, J. C., Liot, G., Lecart, S., Saudou, F., Duyckaerts, C.,  
845 Leveque-Fort, S., and Potier, M. C. (2011) Local cholesterol increase triggers amyloid  
846 precursor protein-Bace1 clustering in lipid rafts and rapid endocytosis. *FASEB J* **25**, 1295-  
847 1305
- 848 88. Hanson, M. A., Cherezov, V., Griffith, M. T., Roth, C. B., Jaakola, V. P., Chien, E. Y.,  
849 Velasquez, J., Kuhn, P., and Stevens, R. C. (2008) A specific cholesterol binding site is  
850 established by the 2.8 Å structure of the human beta2-adrenergic receptor. *Structure* **16**, 897-  
851 905
- 852 89. Zarrouk, A., Debbabi, M., Bezine, M., Karym, E. M., Badreddine, A., Rouaud, O., Moreau, T.,  
853 Cherkaoui-Malki, M., El Ayeb, M., Nasser, B., Hammami, M., and Lizard, G. (2018) Lipid  
854 Biomarkers in Alzheimer's Disease. *Curr Alzheimer Res* **15**, 303-312
- 855 90. Kosicek, M., and Hecimovic, S. (2013) Phospholipids and Alzheimer's disease: alterations,  
856 mechanisms and potential biomarkers. *Int J Mol Sci* **14**, 1310-1322
- 857 91. Mapstone, M., Cheema, A. K., Fiandaca, M. S., Zhong, X., Mhyre, T. R., MacArthur, L. H.,  
858 Hall, W. J., Fisher, S. G., Peterson, D. R., Haley, J. M., Nazar, M. D., Rich, S. A., Berlau, D.  
859 J., Peltz, C. B., Tan, M. T., Kawas, C. H., and Federoff, H. J. (2014) Plasma phospholipids  
860 identify antecedent memory impairment in older adults. *Nat Med* **20**, 415-418



861 **Figure legends**

862 **Figure 1: Dietary cholesterol intake induces CETP expression:** **A:** Feeding schedule & study  
863 design. Wt and CETP<sup>tg</sup> animals were fed for 1 month starting at the age of 2 months. Biochemical  
864 analyses were performed after 3 months of age. **B:** CETP activity of CETP<sup>tg</sup> or wt animals was  
865 measured from 1  $\mu$ L plasma using the fluorescence-based CETP activity assay (Roar biomedical).  
866 n=6-14, mean  $\pm$  SEM; 2-way ANOVA, Tukey's multiple comparison. **C:** Relative normalised CETP  
867 expression. RT-qPCR of liver samples at the age of 5 months. n=5-8, mean  $\pm$  SEM; 2-way ANOVA,  
868 Tukey's multiple comparison. **D:** CETP western blot from liver lysates. Liver lysates were separated  
869 on 10% SDS-PA gels. CETP was detected using the TP2 monoclonal antibody. **E:** Quantification of  
870 CETP western blots as shown in **D:** n=8, mean  $\pm$  SEM; Students T-test. **F-I:** Plasma lipoprotein  
871 analysis: **F:** HDL-C, **G:** LDL-C, **H:** total cholesterol **I:** and triglycerides from mouse plasma samples.  
872 Plasma samples were analysed on a COBAS Integra 400 Plus (ROCHE) analyser using the following  
873 kits: COBAS INTEGRA CHOL 2, COBAS INTEGRA HDL-C gen3, and COBAS Integra TRIG GPO  
874 250, respectively. The levels of LDL-C were calculated using the Friedewald formula: [total  
875 cholesterol] – [HDL-C] – [TG/2.2]. n=6-14. mean  $\pm$  SEM; 2-way ANOVA, Tukey's multiple comparison.  
876 **J:** Mouse weight increase: Net weight increase of wt and CETP<sup>tg</sup> mice during the feeding period.

877

878 **Figure 2: CETP promotes ABCA7 and TREM2 expression in the liver:** **A:** Feeding schedule &  
879 study design. Wt and CETP<sup>tg</sup> mice were fed for 3 months starting at the age of 2 months. Biochemical  
880 analyses were performed at 5 months. **B-D:** Normalized RT-qPCR from mouse liver tissue. **B:**  
881 HMGCR, **C:** LDLR and **D:** LRP1 expression, n=6-14, mean  $\pm$  SEM; 2-way ANOVA, Tukey's multiple  
882 comparison. **E:** Western blot analysis of ABCA7 and TREM2 from liver lysates. Antibodies used:  
883 rabbit-anti-GAPDH (14C10, Cell Signaling), anti-TREM2 (Mab1729 R&D systems) and anti-ABCA7  
884 (polyclonal, Thermo Fisher), n=6; mean  $\pm$  SEM, Students T-test. **F-I:** Expression analysis of ABCA7  
885 and TREM2 from liver samples. Normalized RT-qPCR levels of liver **F:** ABCA7 and **H:** TREM2; n=6-



886 14, mean  $\pm$  SEM; 2-way ANOVA, Tukey's multiple comparison. Western blot quantification of **G**:  
887 ABCA7 and **I**: TREM2; n=6; mean  $\pm$  SEM, Students T-test.

888

889 **Figure 3: CETP activity promotes peripheral inflammation: A, B:** Plasma cytokine levels. **A:** TNF $\alpha$   
890 and **B:** IL1 $\beta$  measured in 25  $\mu$ L plasma using a multiplex ELISA (mesoscale discoveries); n=6-11.  
891 mean  $\pm$  SEM; 2-way ANOVA, Tukey's multiple comparison. **C-F:** RT-qPCR of liver samples from 5-  
892 month old mice. Normalised expression of: **C:** TNF $\alpha$ , **D:** IL1 $\beta$ , **E:** TLR4 and **F:** IL6 expression; n=6-  
893 14, mean  $\pm$  SEM; 2-way ANOVA, Tukey's multiple comparison. **G-K:** Cytokine mRNA expression in  
894 brain samples by normalized RT-qPCR: **G:** CETP, **H:** TNF $\alpha$ , **I:** IL6, **J:** IL1 $\beta$  and **K:** TLR4 expression;  
895 n=6-10. mean  $\pm$  SEM; 2-way ANOVA, Tukey's multiple comparison.

896

897 **Figure 4: CETP changes the brain cholesterol composition: A, B:** MALDI IMS on sagittal brain  
898 sections of 5-month-old wt and CETP<sup>tg</sup> brains. **A:** Heatmap representation of peak intensities  
899 corresponding to cholesterol ( $m/z$  493 [M+107Ag]<sup>+</sup>) and **B** arachidonic acid ( $m/z$  411 [M+107Ag]<sup>+</sup>).  
900 Please note the color scale with white and red depicting highest intensities. **C:** Whole brain sagittal  
901 section representing regions of interest selected for 'whole brain' or hippocampal (HC) quantification.  
902 **D, E:** Quantification of peak intensities corresponding to cholesterol from whole brain (**D**) and  
903 hippocampus (**E**). **F:** Quantification of peak intensities corresponding to arachidonic acid from whole  
904 brain; all n=3, mean  $\pm$  SEM; Students T-test. **G:** Coronal view of mouse brain section showing  
905 hippocampal regions of CA1, CA3, and DG. The blue inset shows the portion of DG that was selected  
906 for demonstrating representative images. **H:** Consecutive confocal stacks from the hippocampus of  
907 1% cholesterol-fed CETP<sup>tg</sup> mice showing multiple filipin-bound cholesterol deposits. Insets show  
908 enlarged views of areas with cholesterol deposits. **I:** representative images of filipin staining in brain  
909 sections of wt and CETP<sup>tg</sup> mice on standard and high cholesterol diet. **J:** Quantifications of filipin  
910 fluorescent intensities in different hippocampal regions; n=3, mean  $\pm$  SEM, two-way ANOVA followed  
911 by Bonferroni's multiple comparisons test. Scale bars=100  $\mu$ m.

912

913 **Figure 5: Transcriptional changes in CETPtg brain induced by presenilins:** **A:** Flow cytometry  
914 analysis of astrocyte purification from 5-months-old mouse brains. GLAST-positive astrocytes were  
915 stained with GFAP. More than 80% of purified cells were GFAP positive. **B:** CETP RT-qPCR of  
916 astrocyte mRNA, n=2-3. mean  $\pm$  SEM; 2-way ANOVA. **C:** Volcano plot of the mouse microarray  
917 results. Each dot represents an individual gene. The p-value of plotted against the gene regulation  
918 fold change of the corresponding gene. P-values cut-off for significance was set to  $<0.05$ . **D:** Overall,  
919 595 genes were found to be significantly up-regulated and 431 genes were found to be significantly  
920 down-regulated in our data set. **E:** Genes involved in the *de novo* synthesis of cholesterol, generation  
921 of arachidonic acid and lipoprotein receptors. **F:** Alzheimer's disease risk genes regulated in our data  
922 set. **G:** Pathways analysis of upstream regulators. Analyzing the fold changes in the dataset,  
923 PTGER4, presenilin 1 (PSEN1) and presenilin 2 (PSEN2) are the top 3 predicted upstream regulators.  
924 A total of 21 genes that have been reported to be regulated via PS1 and have been found in our  
925 dataset. 14 of these genes have also been reported to be regulated via PS2 (highlighted in blue).  
926 Upstream regulator analysis was performed using ingenious pathway analysis. **H:** Representative  
927 images of astrocytes (green) and C1q (red) immunostaining in brain sections of wt and CETPtg mice  
928 on normal and high cholesterol diet. **I:** Quantifications of C1q fluorescent intensities in hippocampus  
929 n=3, mean  $\pm$  SEM, two-way ANOVA followed by Bonferroni's multiple comparisons test. Scale  
930 bar=100  $\mu$ m. **NCBI gene numbers:** HMGCR: 15357; SREBF1: 20787; SREBF2: 20788; MVK: 17855;  
931 LRP1: 16971; LDLR: 16835; IDE: 15925; TREM2: 83433; IL1B: 16176; CASP8: 12370; ACE: 11421;  
932 APOE: 11816; SORL1: 20660; C1QA: 20660; CD74: 16149; CTSS: 13040; C1QC: 12262; CTSZ:  
933 64138; Erdr1: 170942; SELPLG: 20345; C3AR1: 12267; C1QB: 12260; CD9: 12527; KIF5B: 16573;  
934 ENPP2: 18606; SLC38A2: 67760; HLA-E: 15040; WARS: 22375; FOXO3: 56484; RELN: 19699;  
935 BDNF: 12064; FMN2: 54418; CUEDC1: 103841; GDF11: 14561

936

937

938 **Figure 6: CETP activates  $\gamma$ -secretase**

939 **A:** CETP activity assay of HEK293T cells transfected with wild type (wt) CETP or an inactive mutant  
940 (CETP M457/L459W). N=3, mean  $\pm$  SEM, students-T test **B:** Normalised relative expression of CETP,  
941 HES1 and p21; n=3, mean  $\pm$  SEM, students T-test. **C:** Schematic representation of changes observed  
942 in liver, plasma and brain in CETP<sup>tg</sup> animals as compared to wild type.

943

944

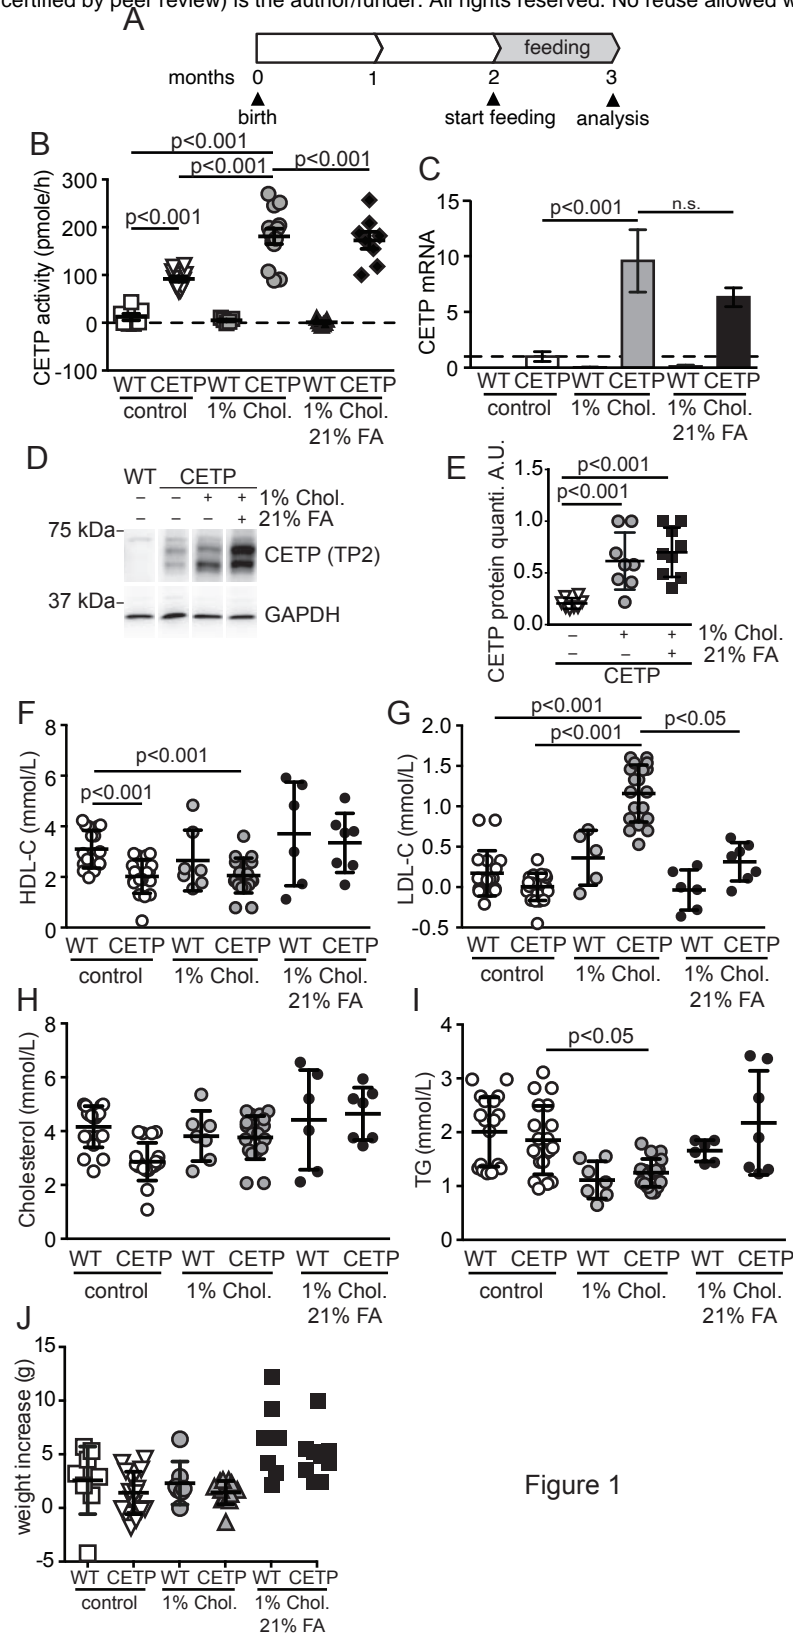

Figure 1

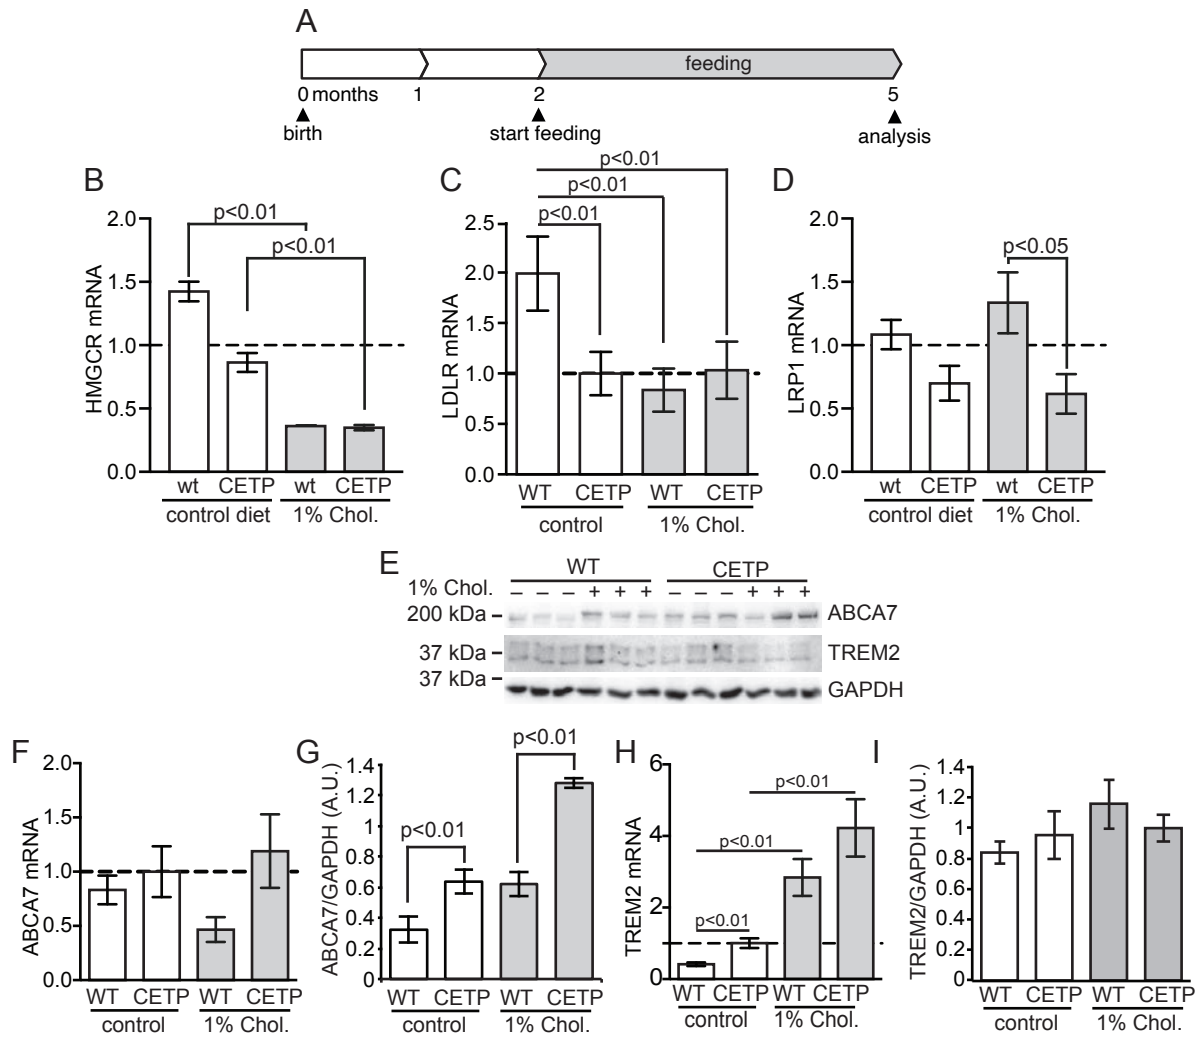

Figure 2

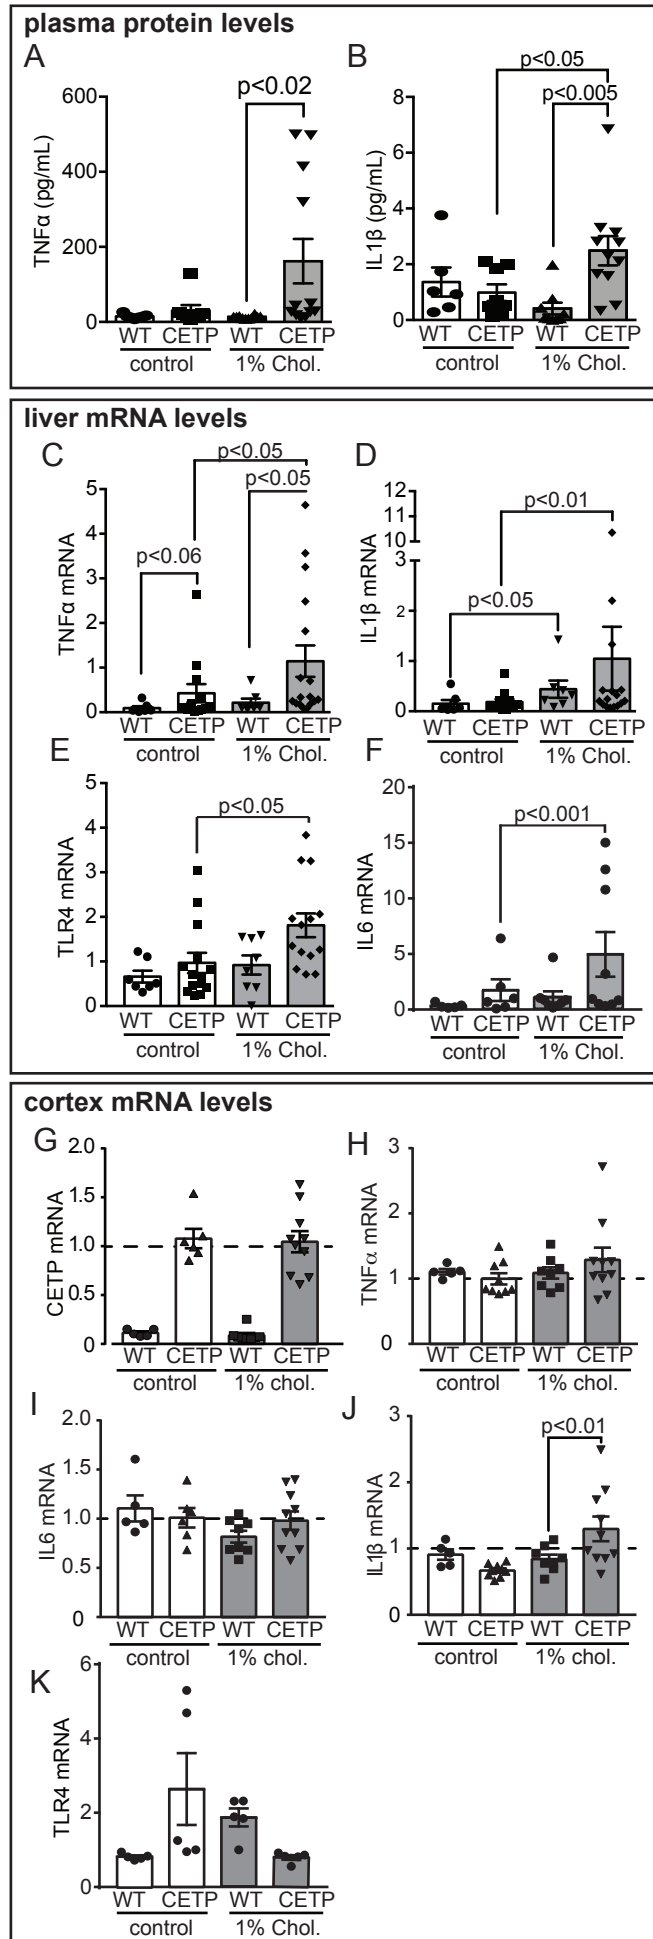

Figure 3

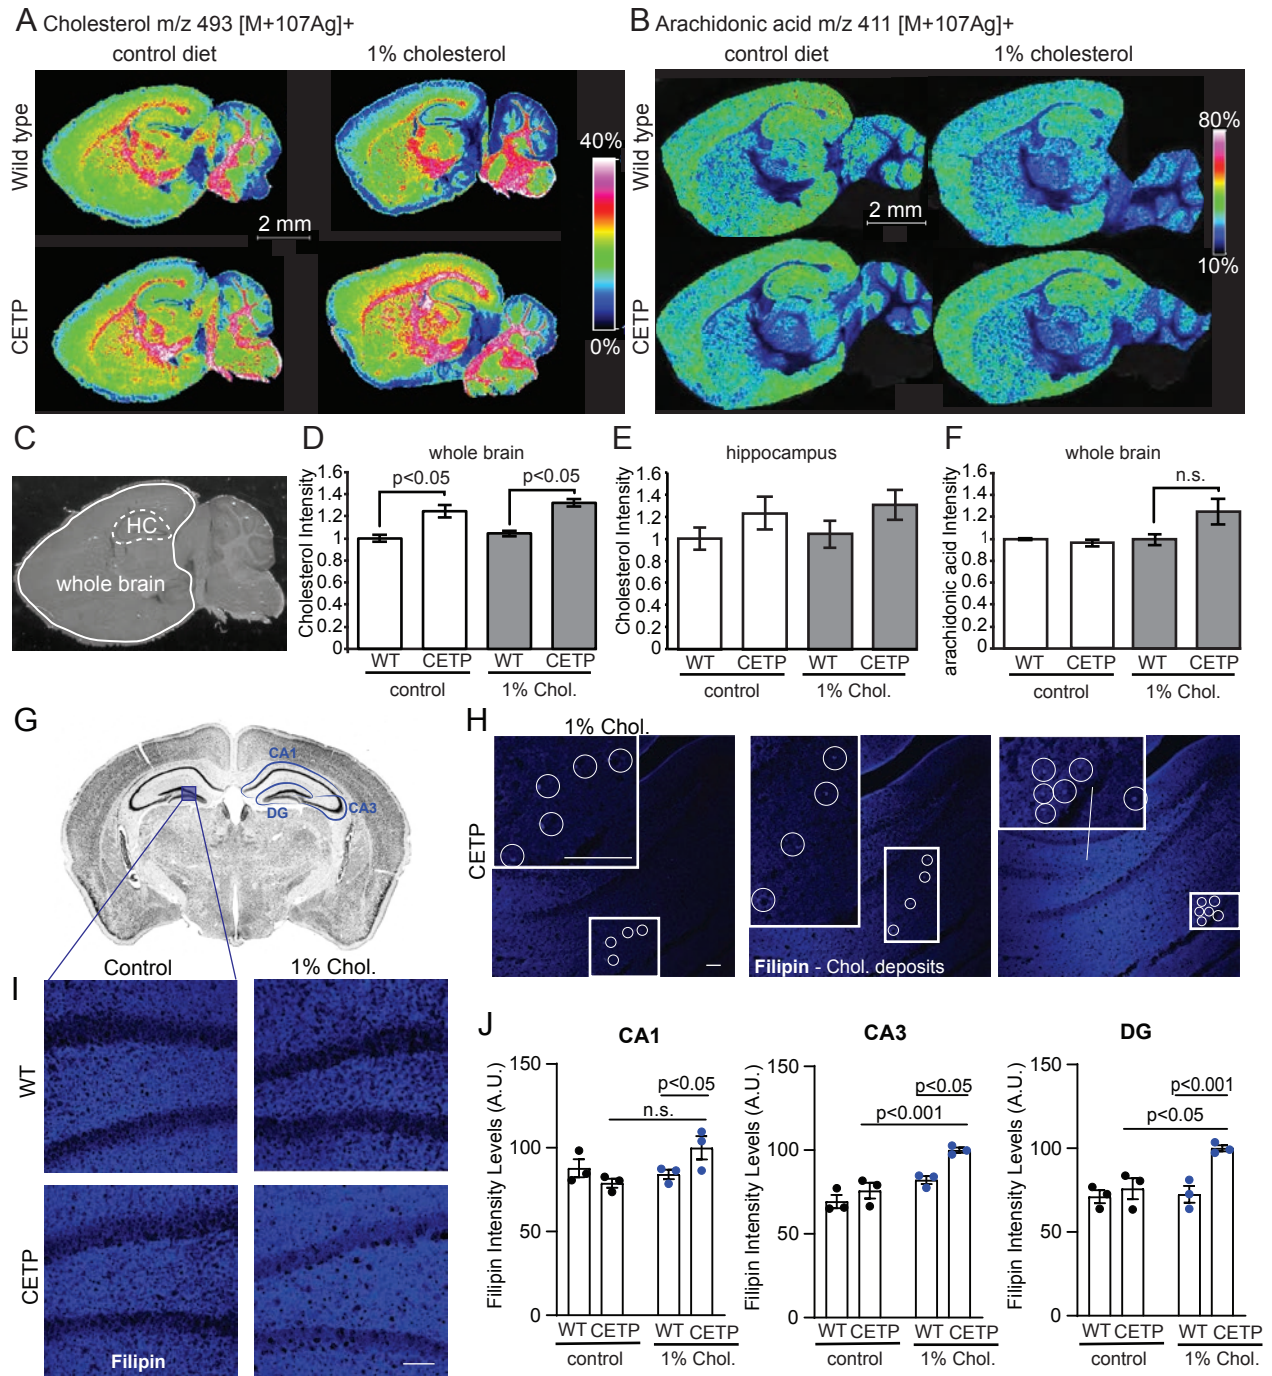

Figure 4



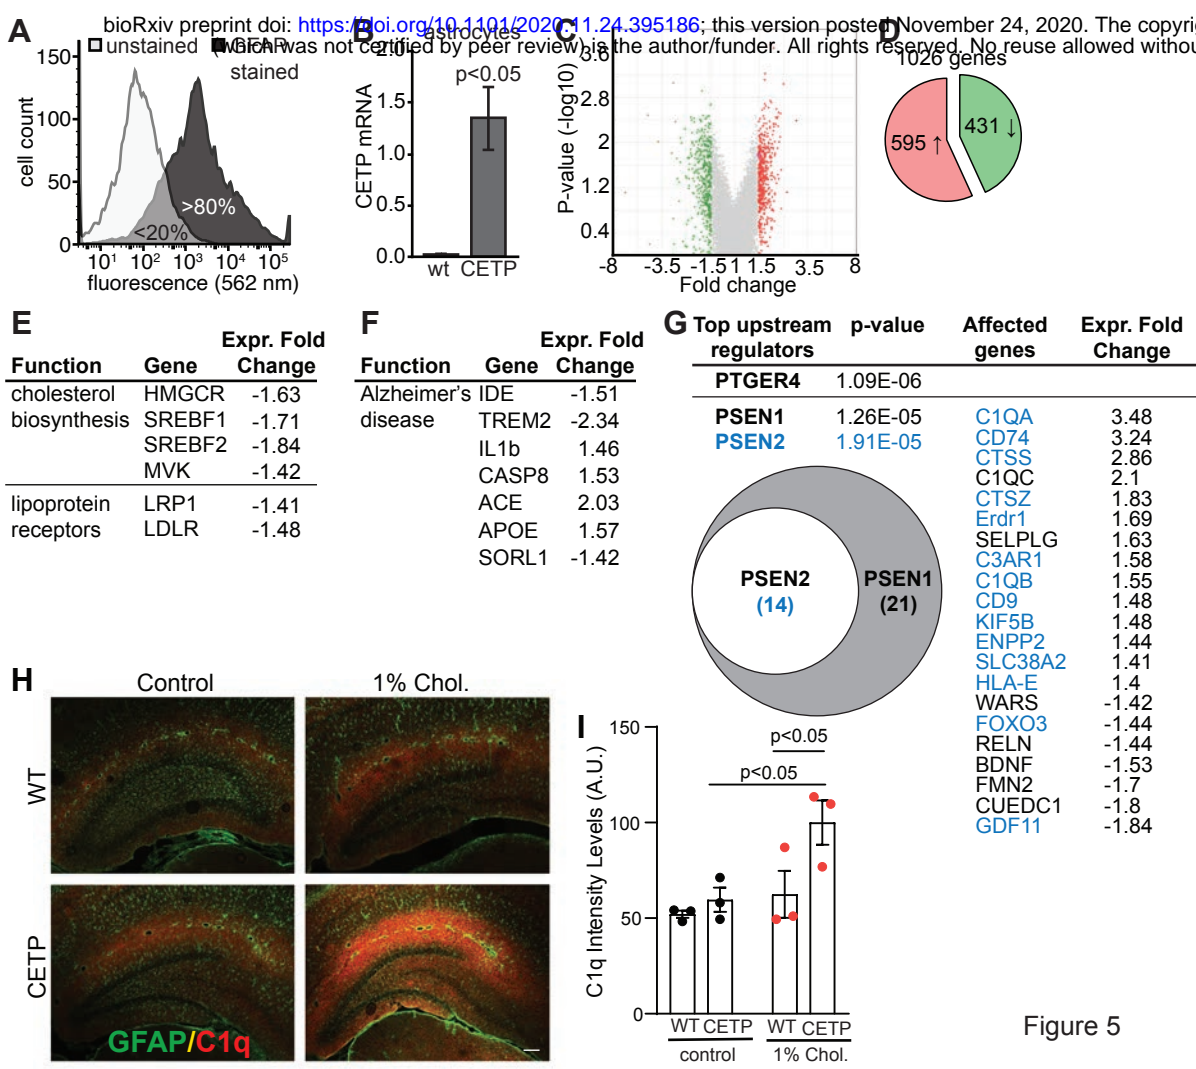

Figure 5



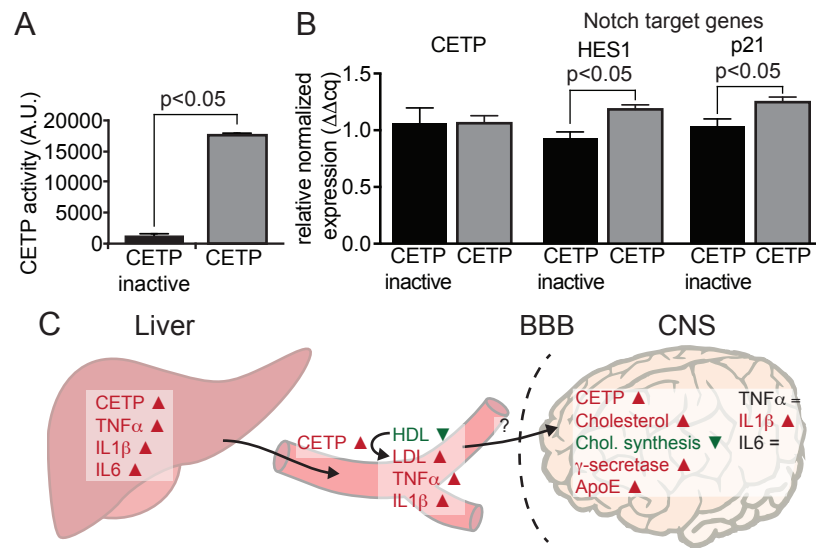

Figure 6
